# Supplementary figures and images for: Forest Communities Spatial Modeling as a Basis for Assessing the Sequestration Potential of Ecosystems (Republic of Tatarstan, Russia)
Source: Preprints.org preprint supplement (doi:10.20944/preprints202311.0008.v1), 2023-11-01

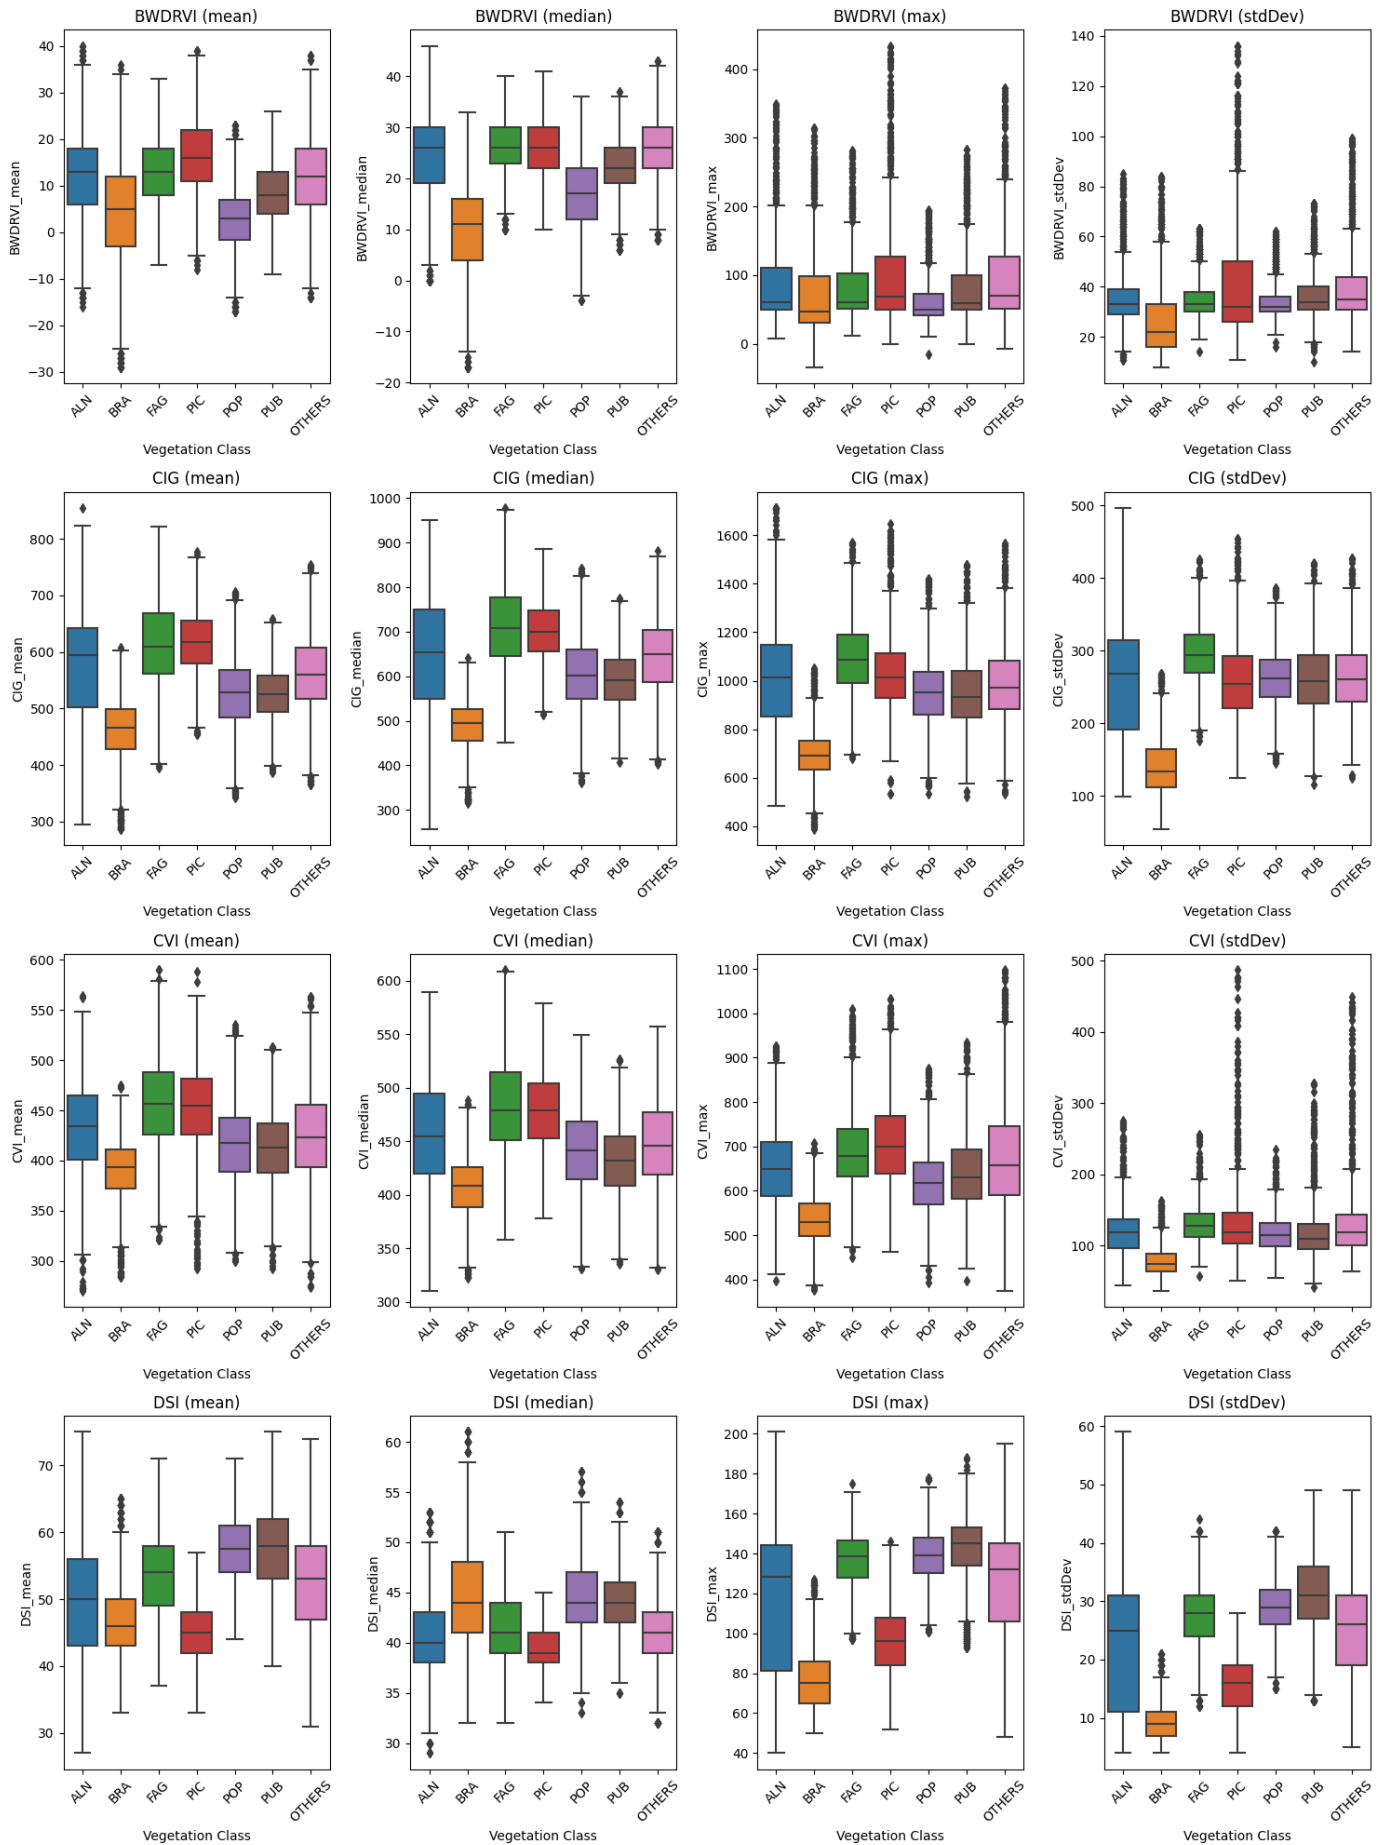

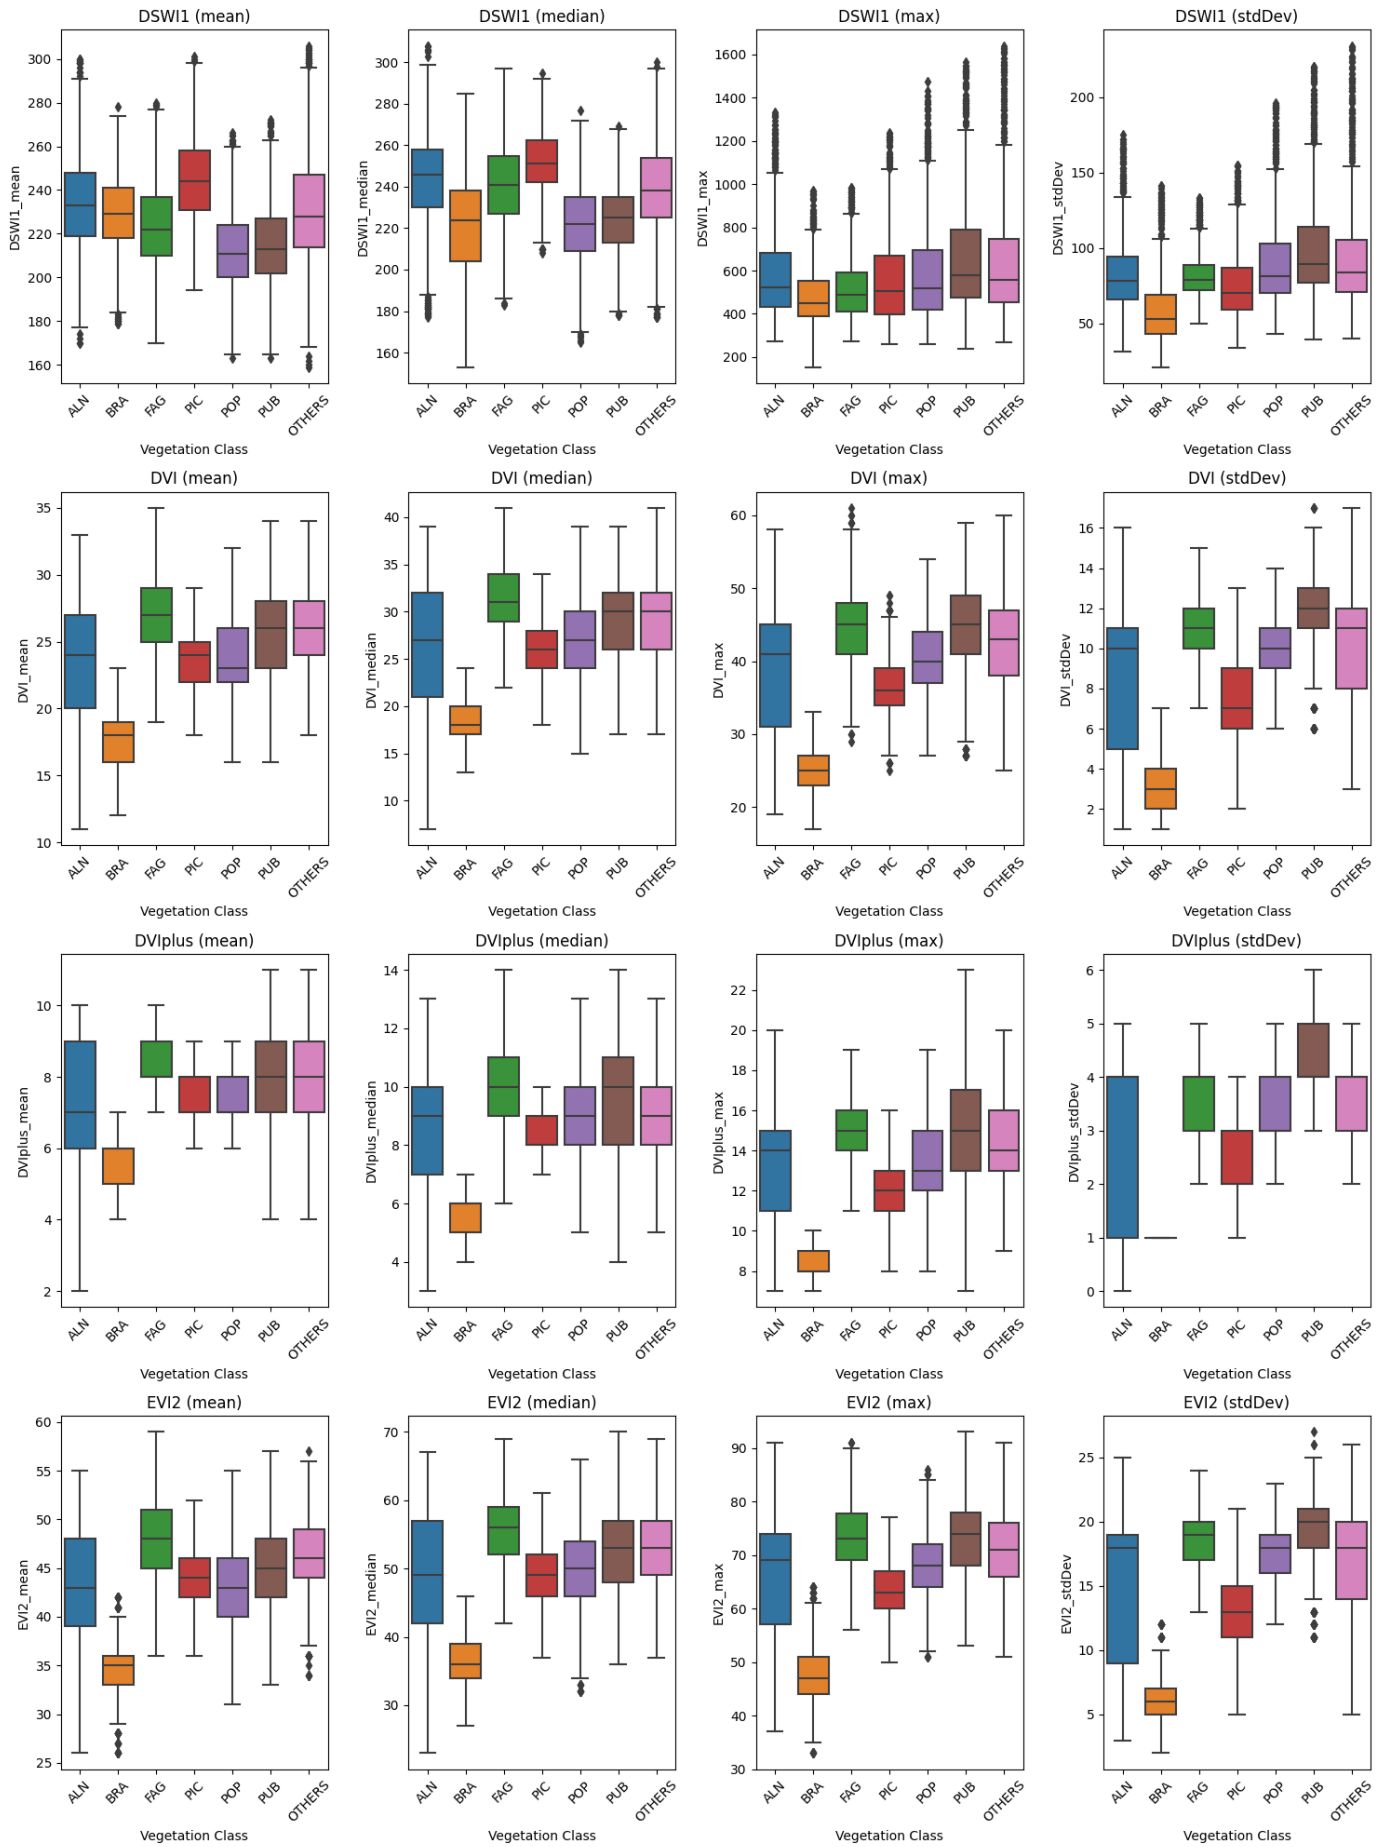

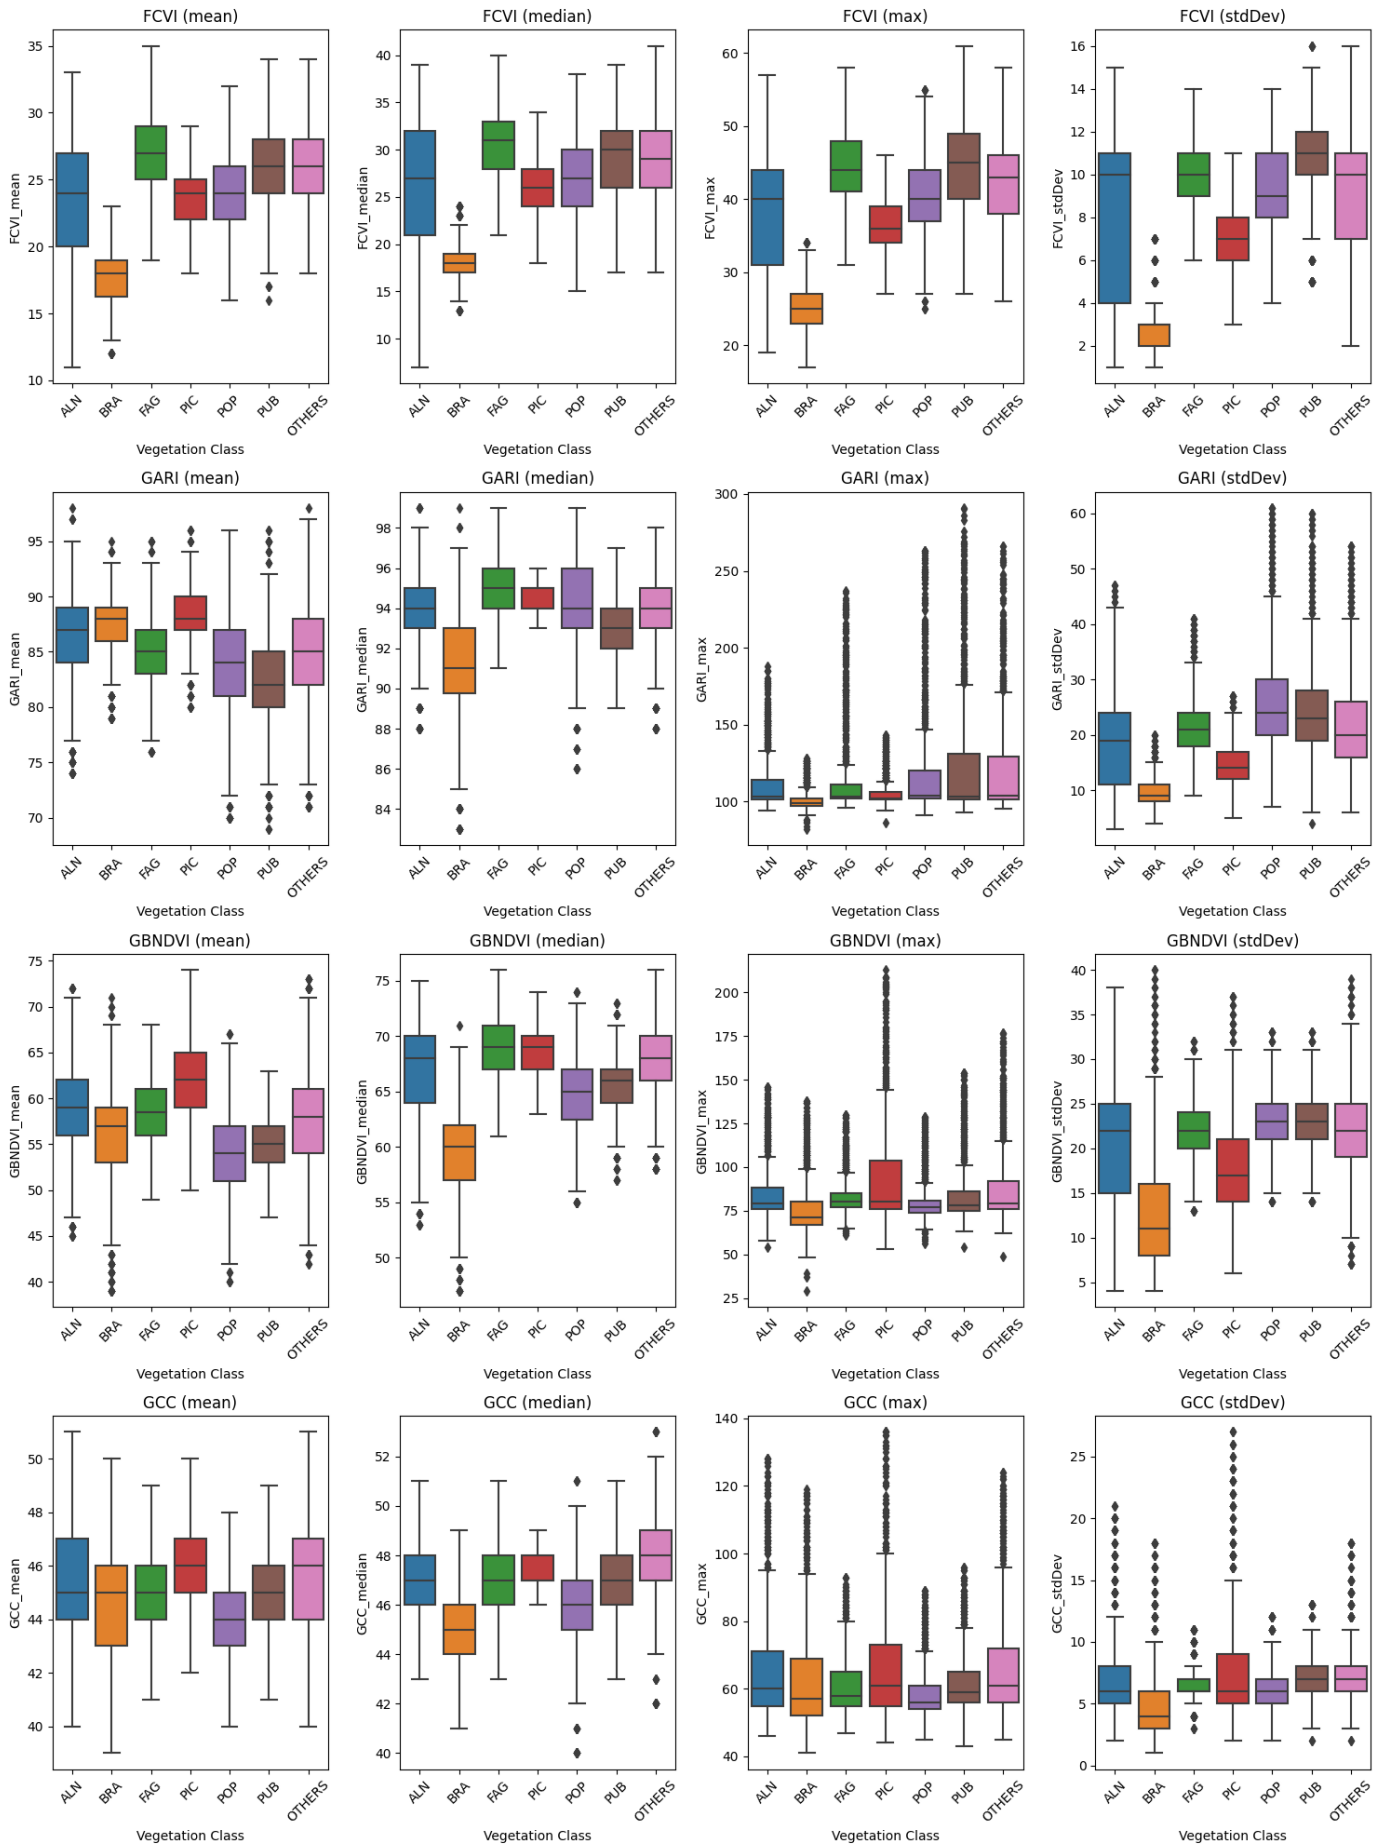

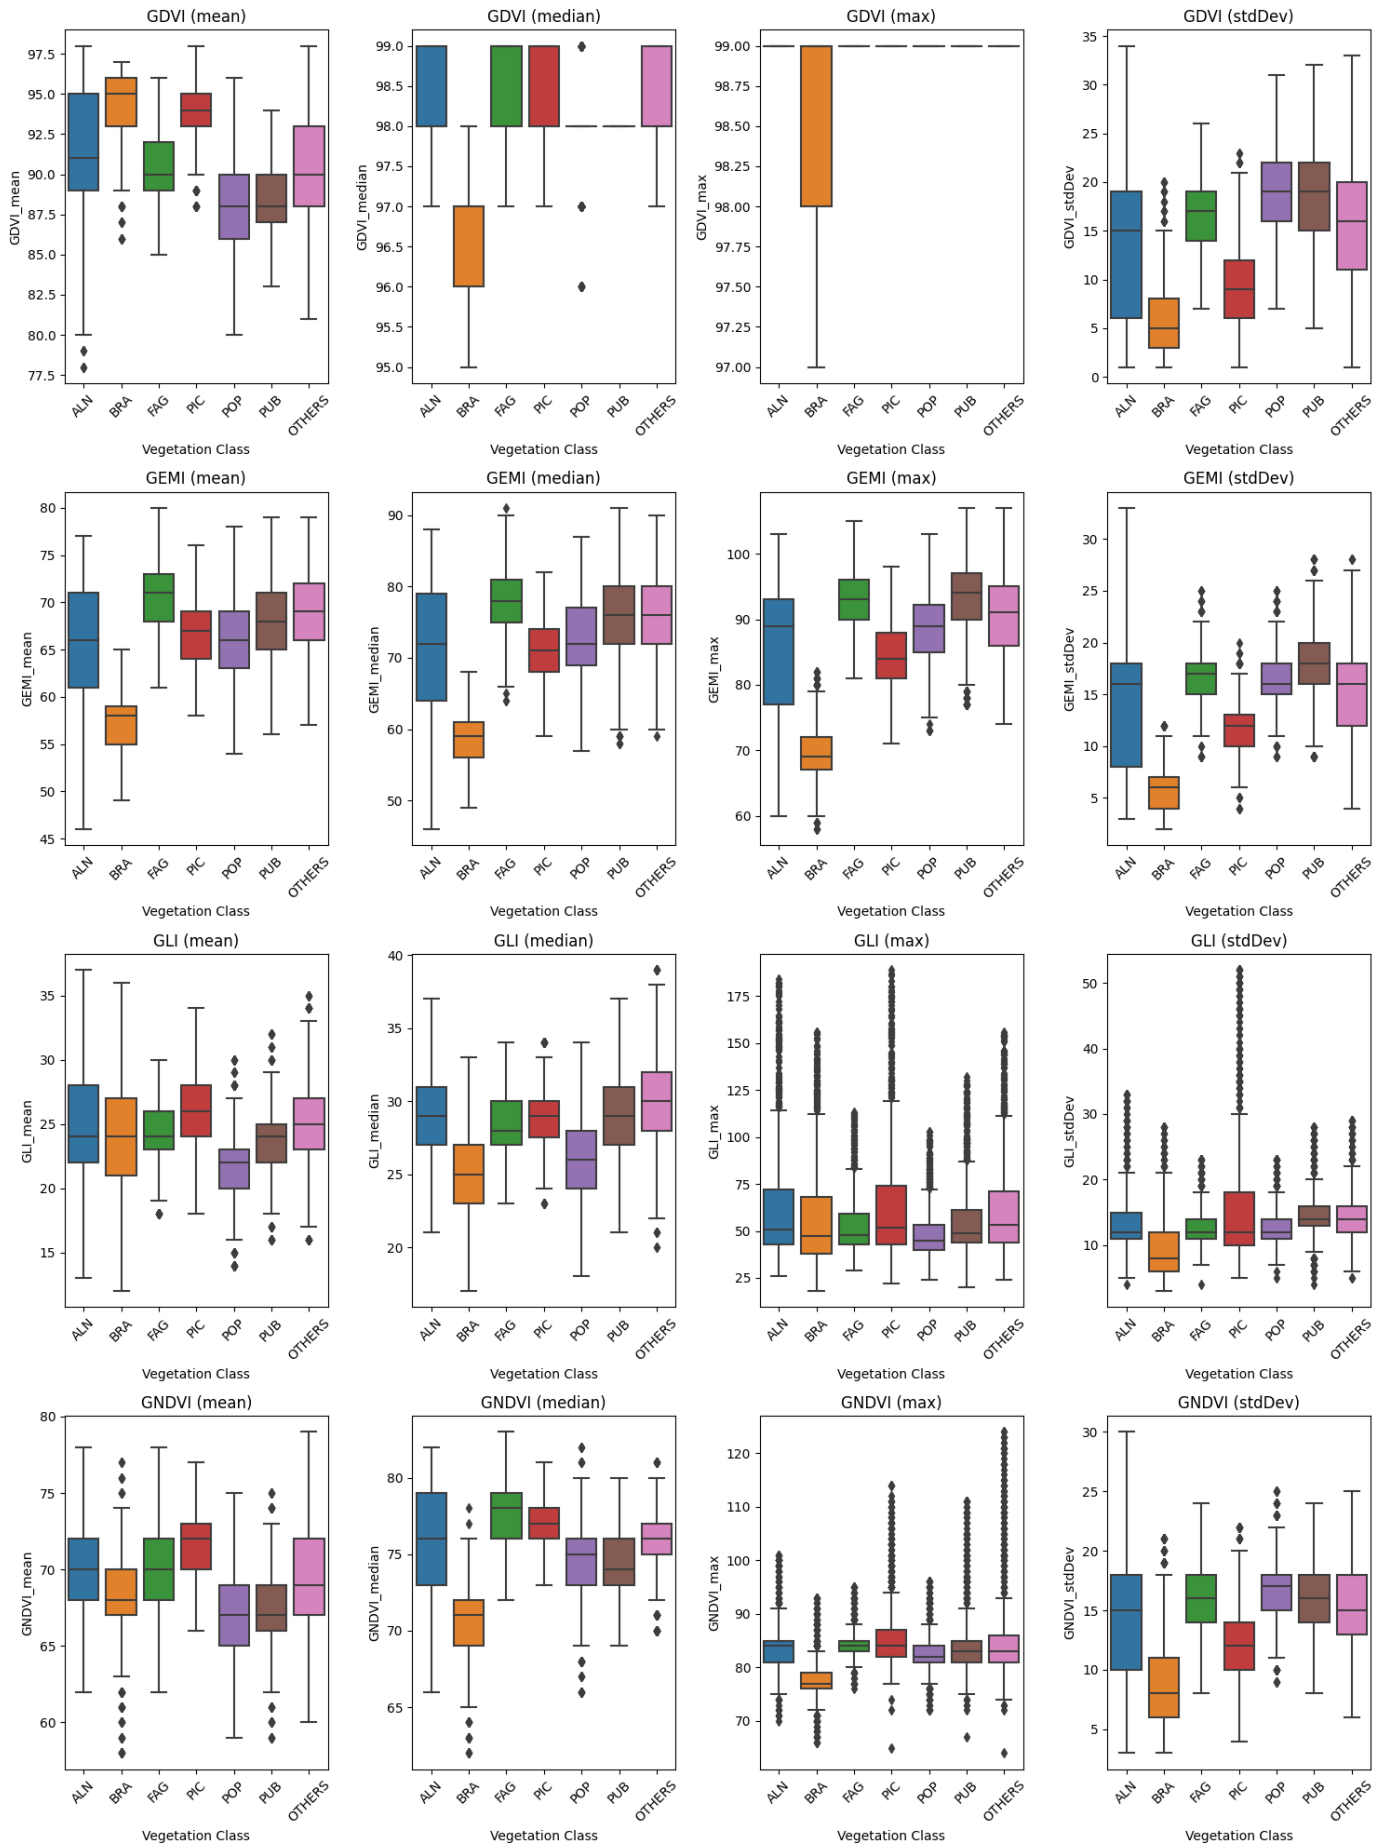

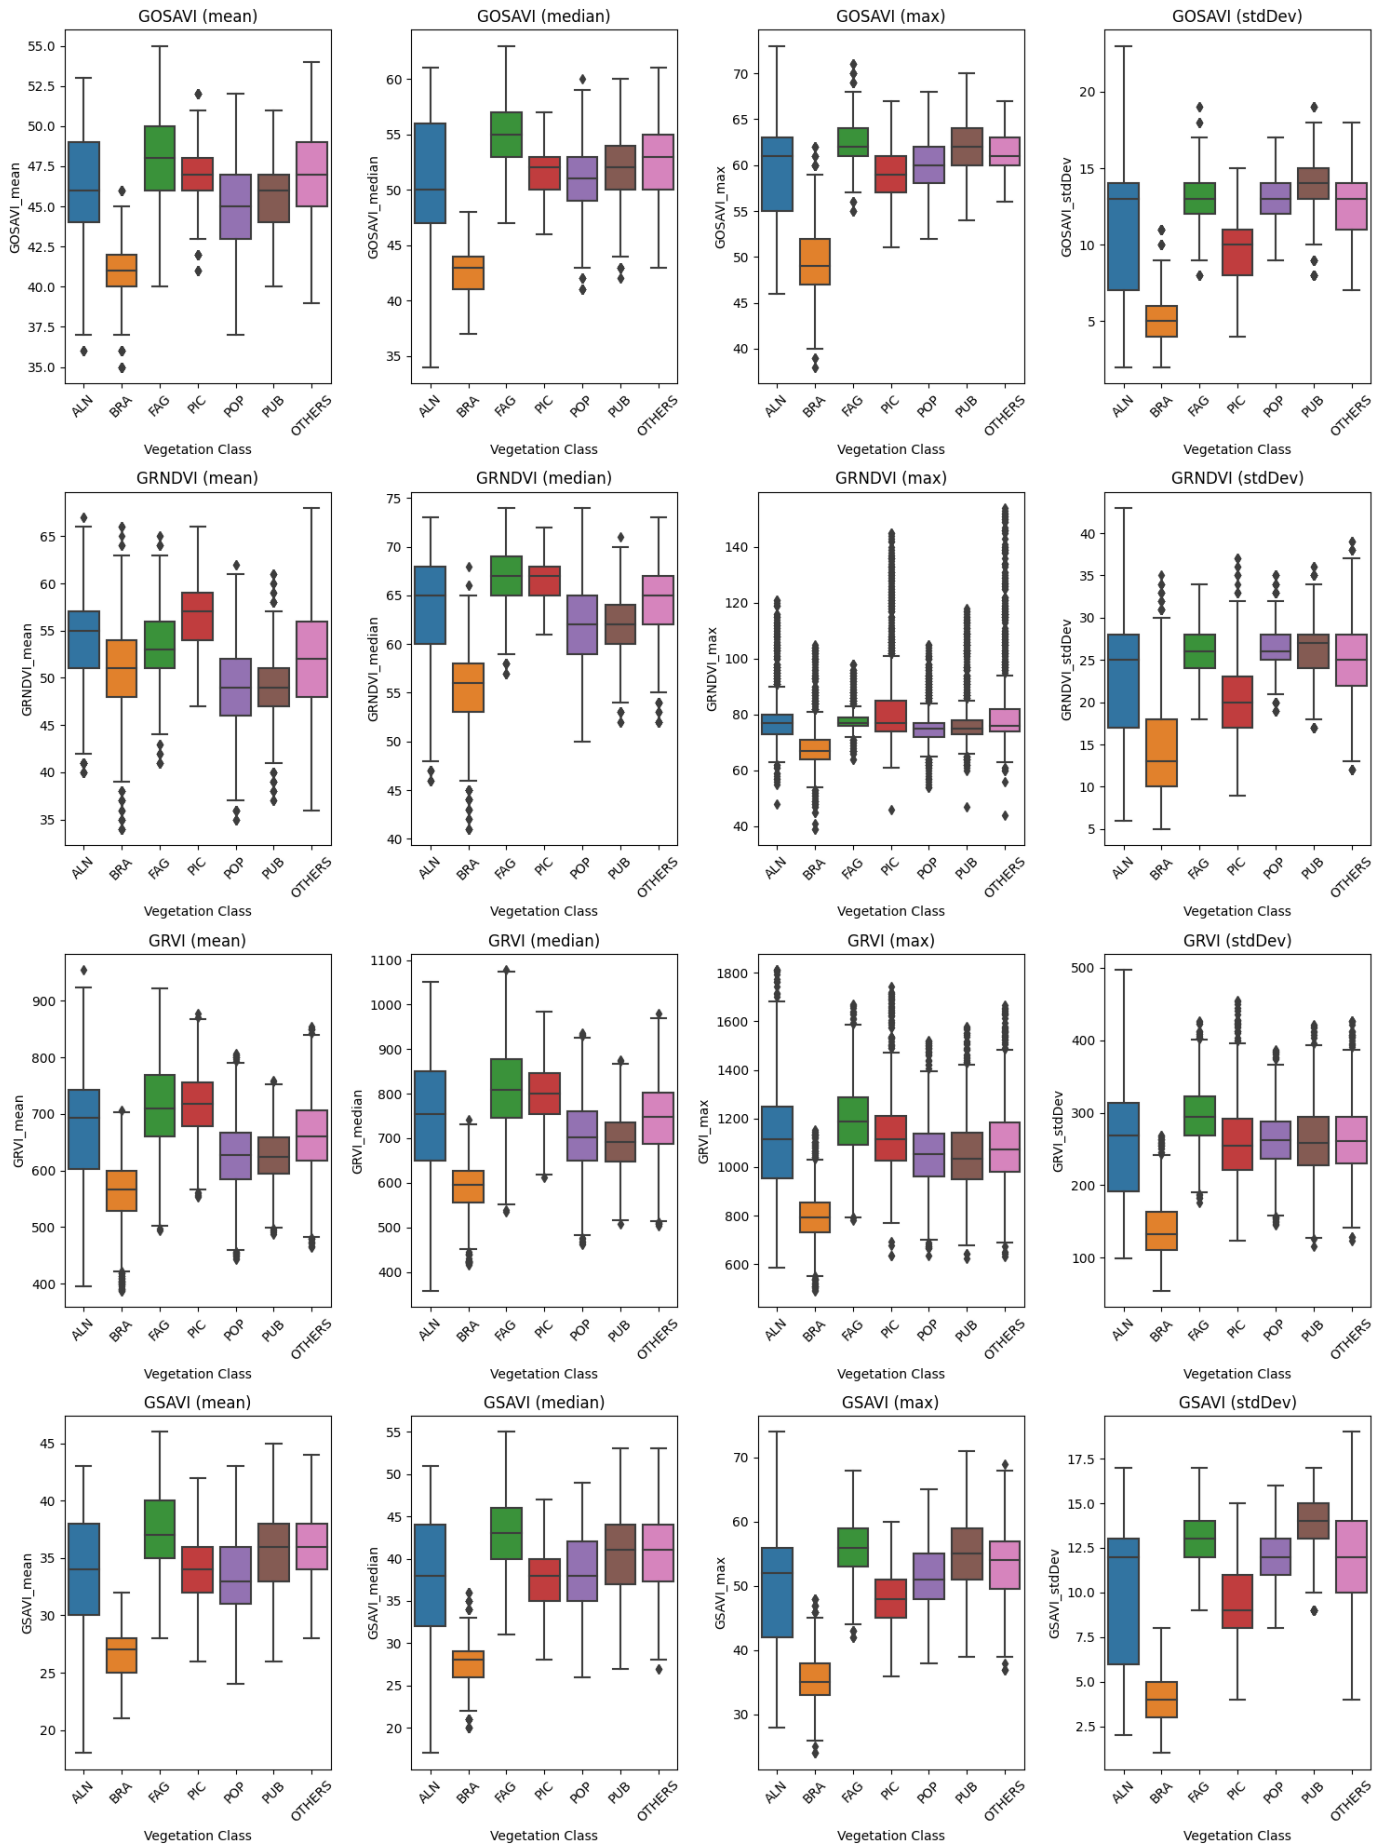

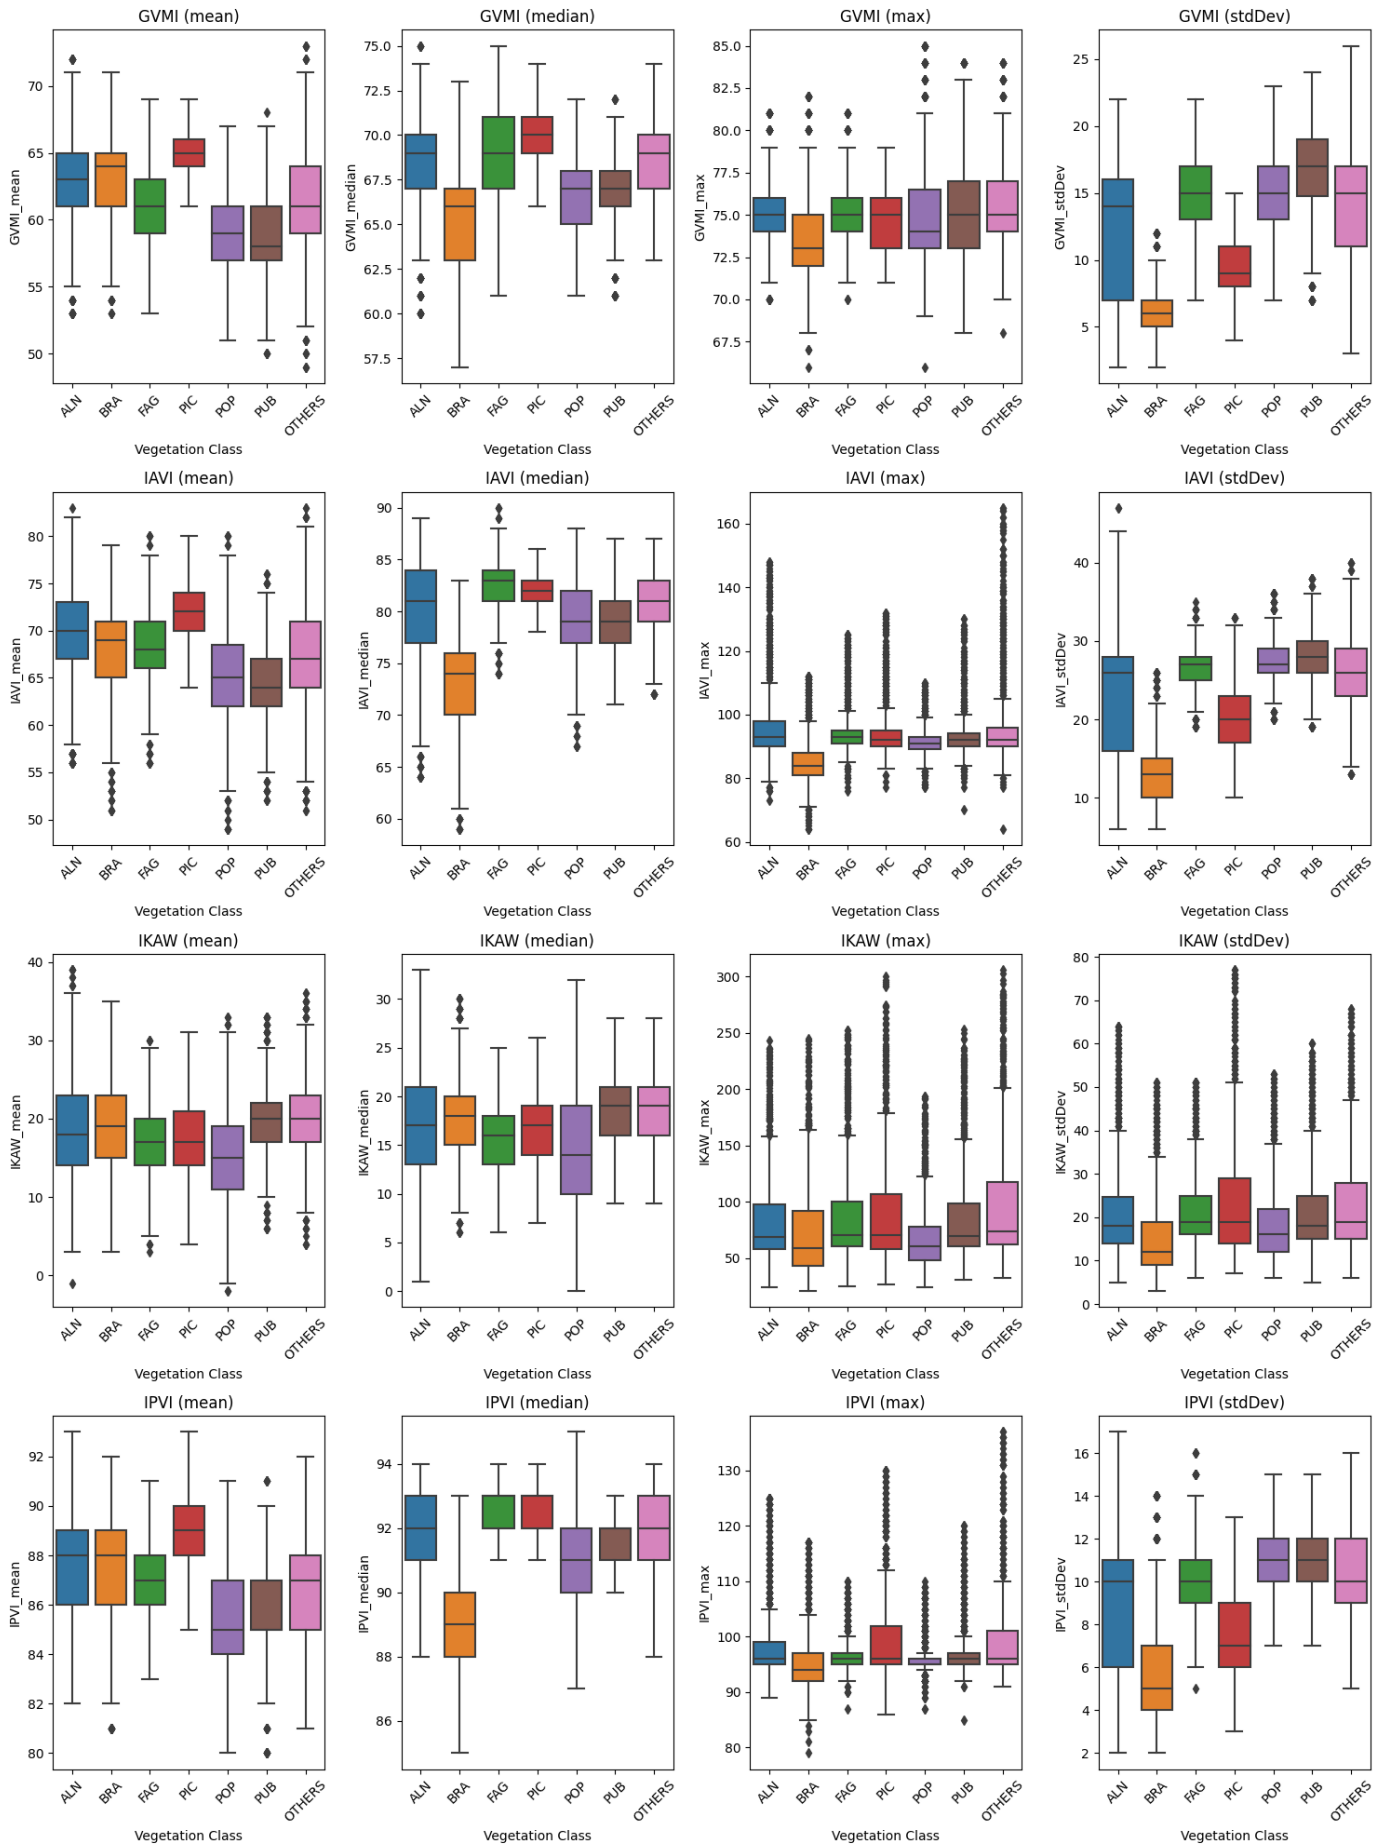

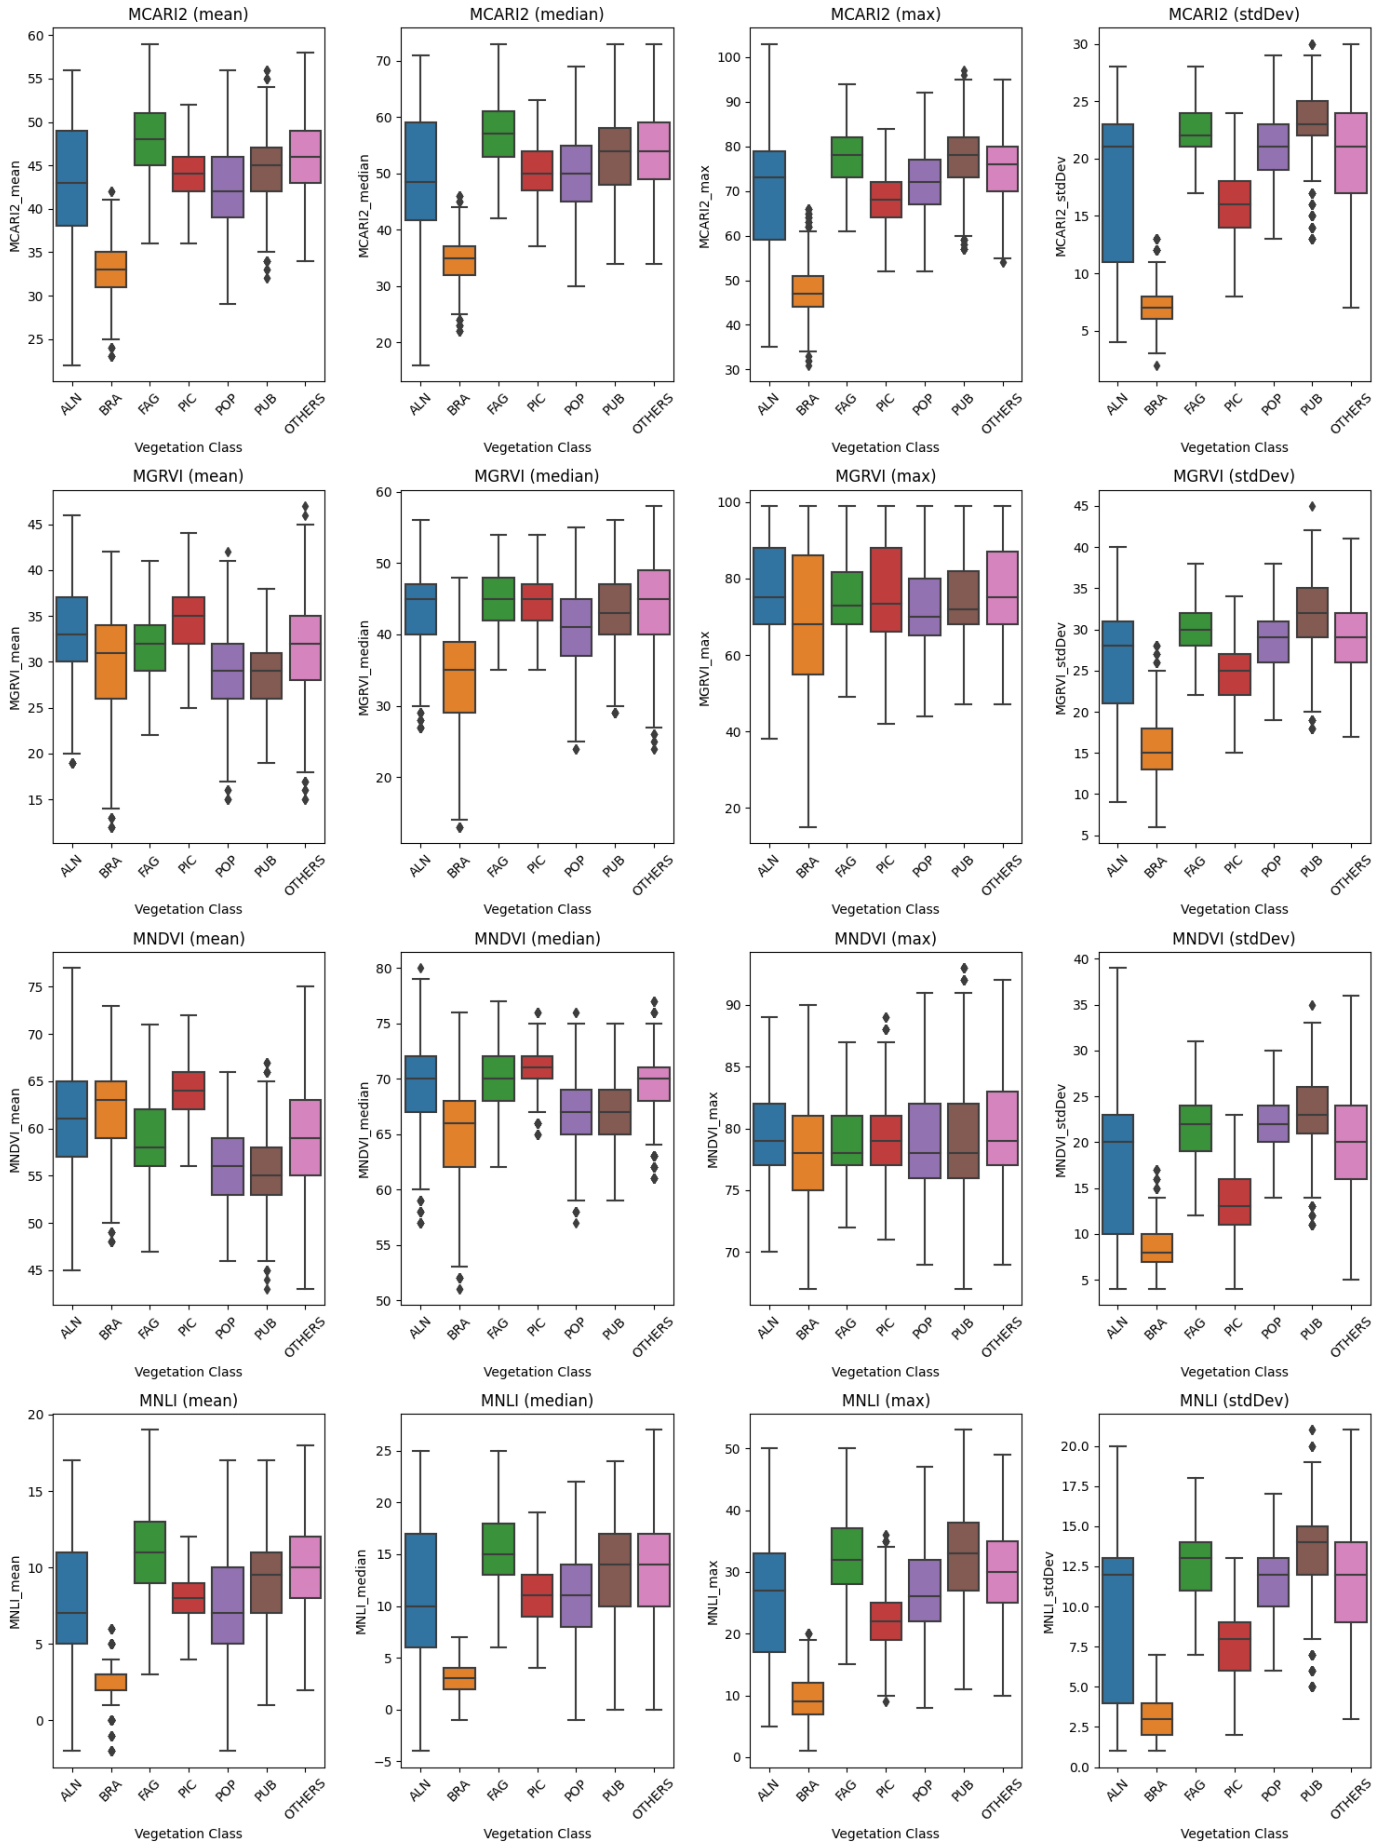

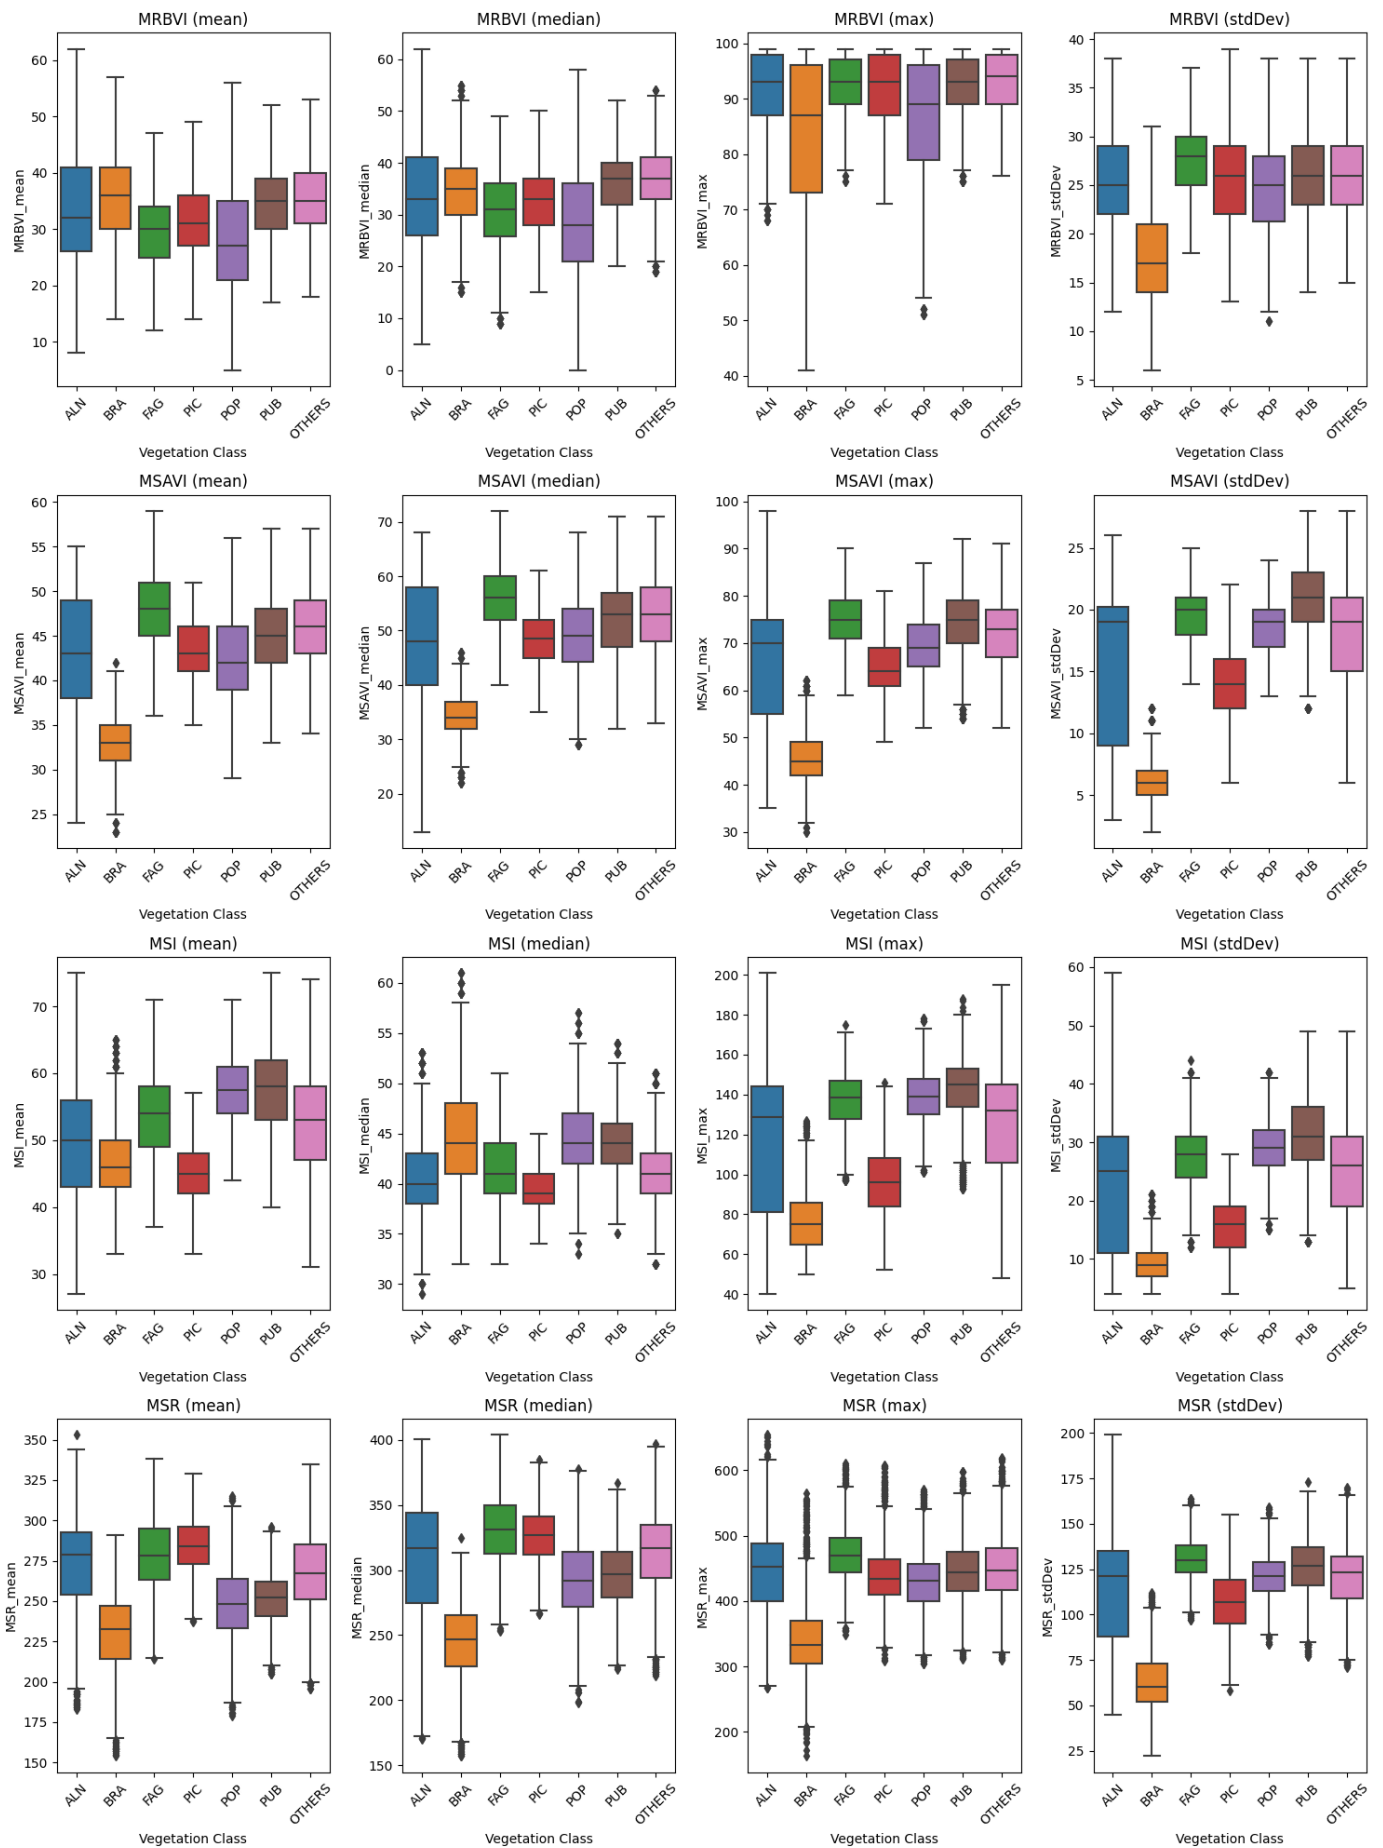



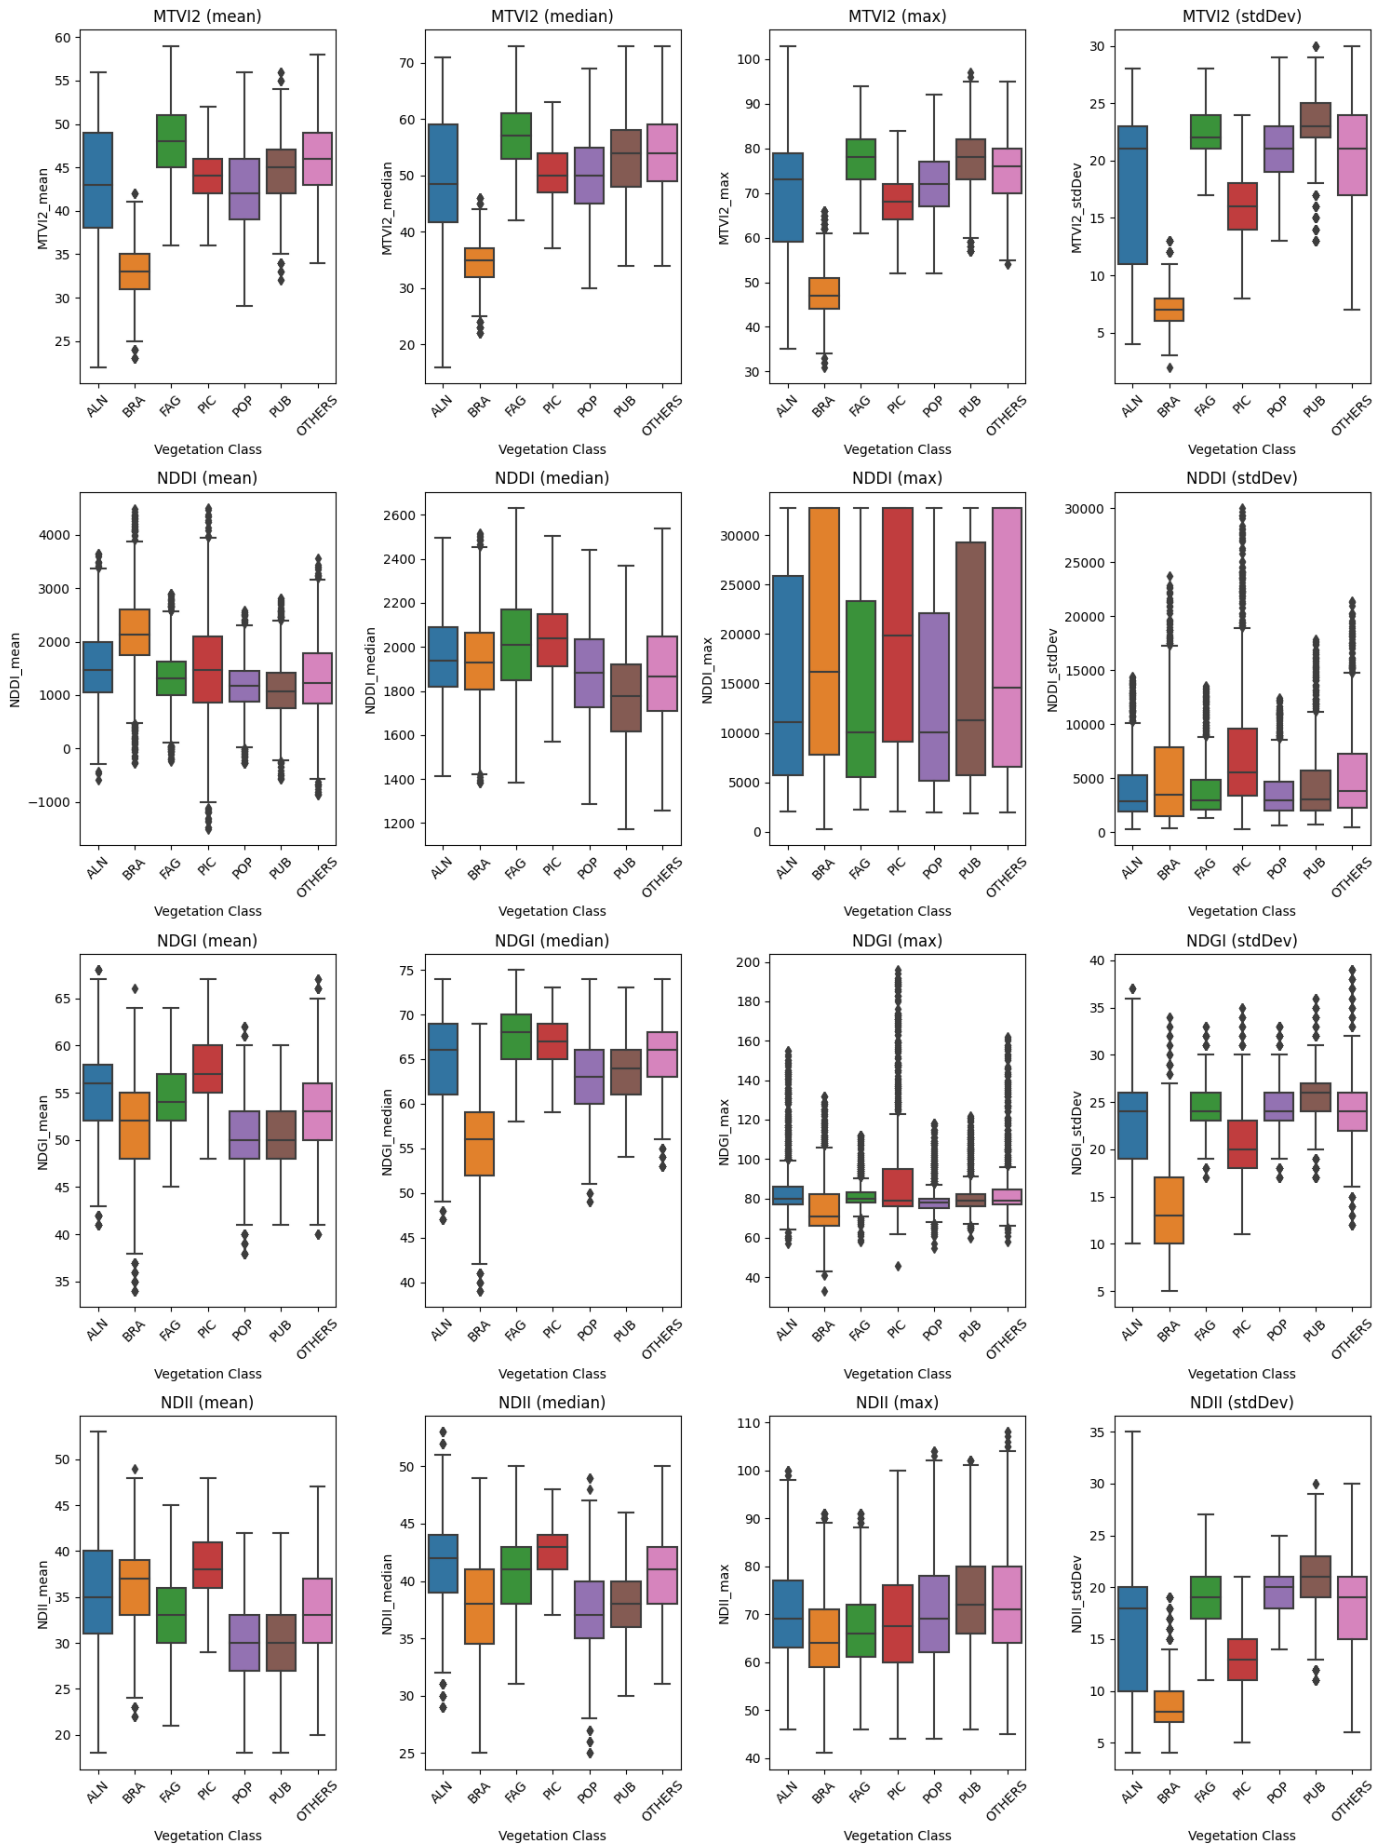

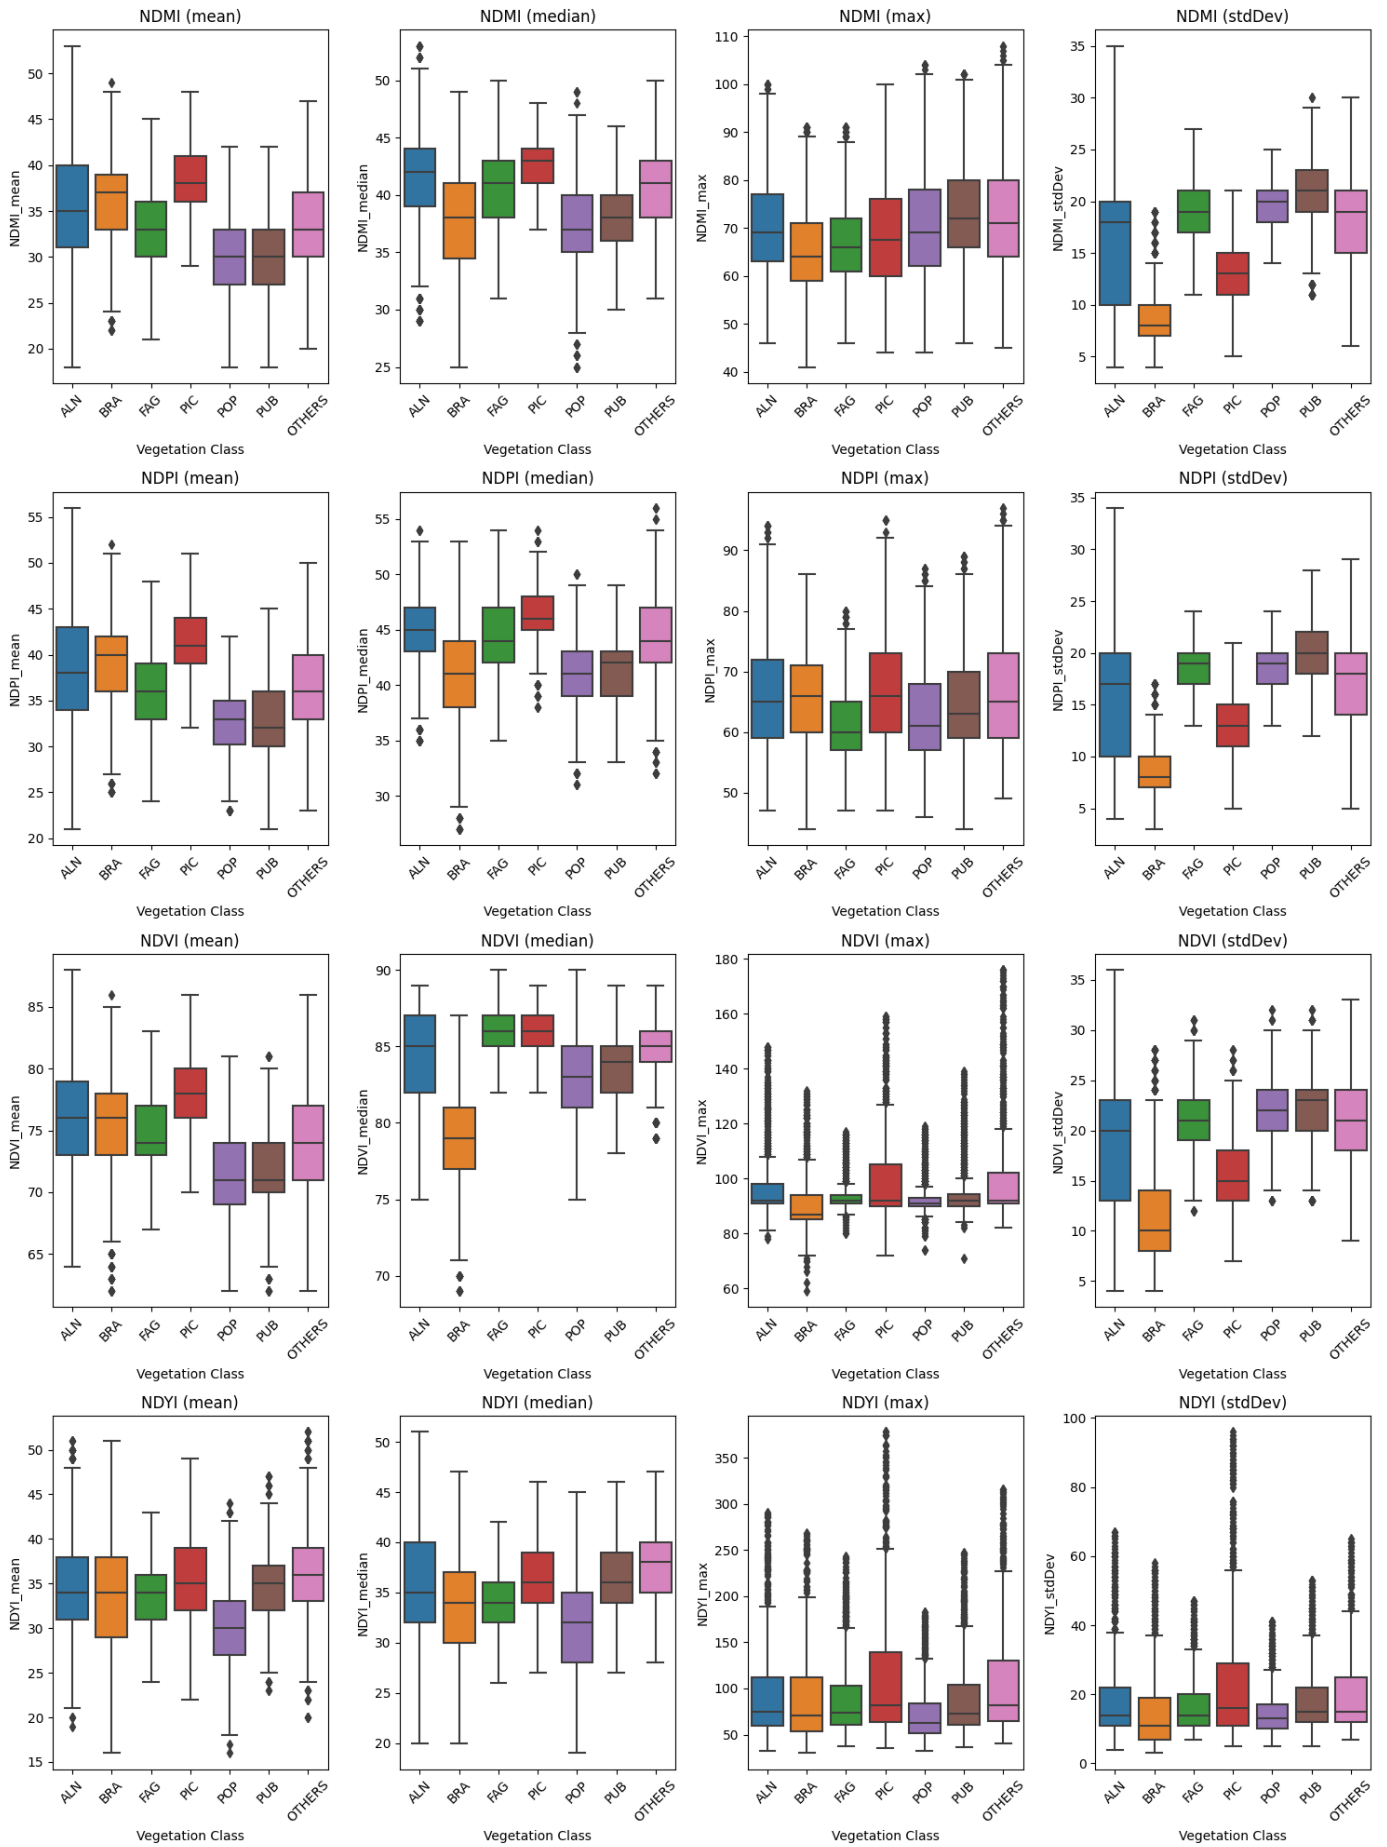

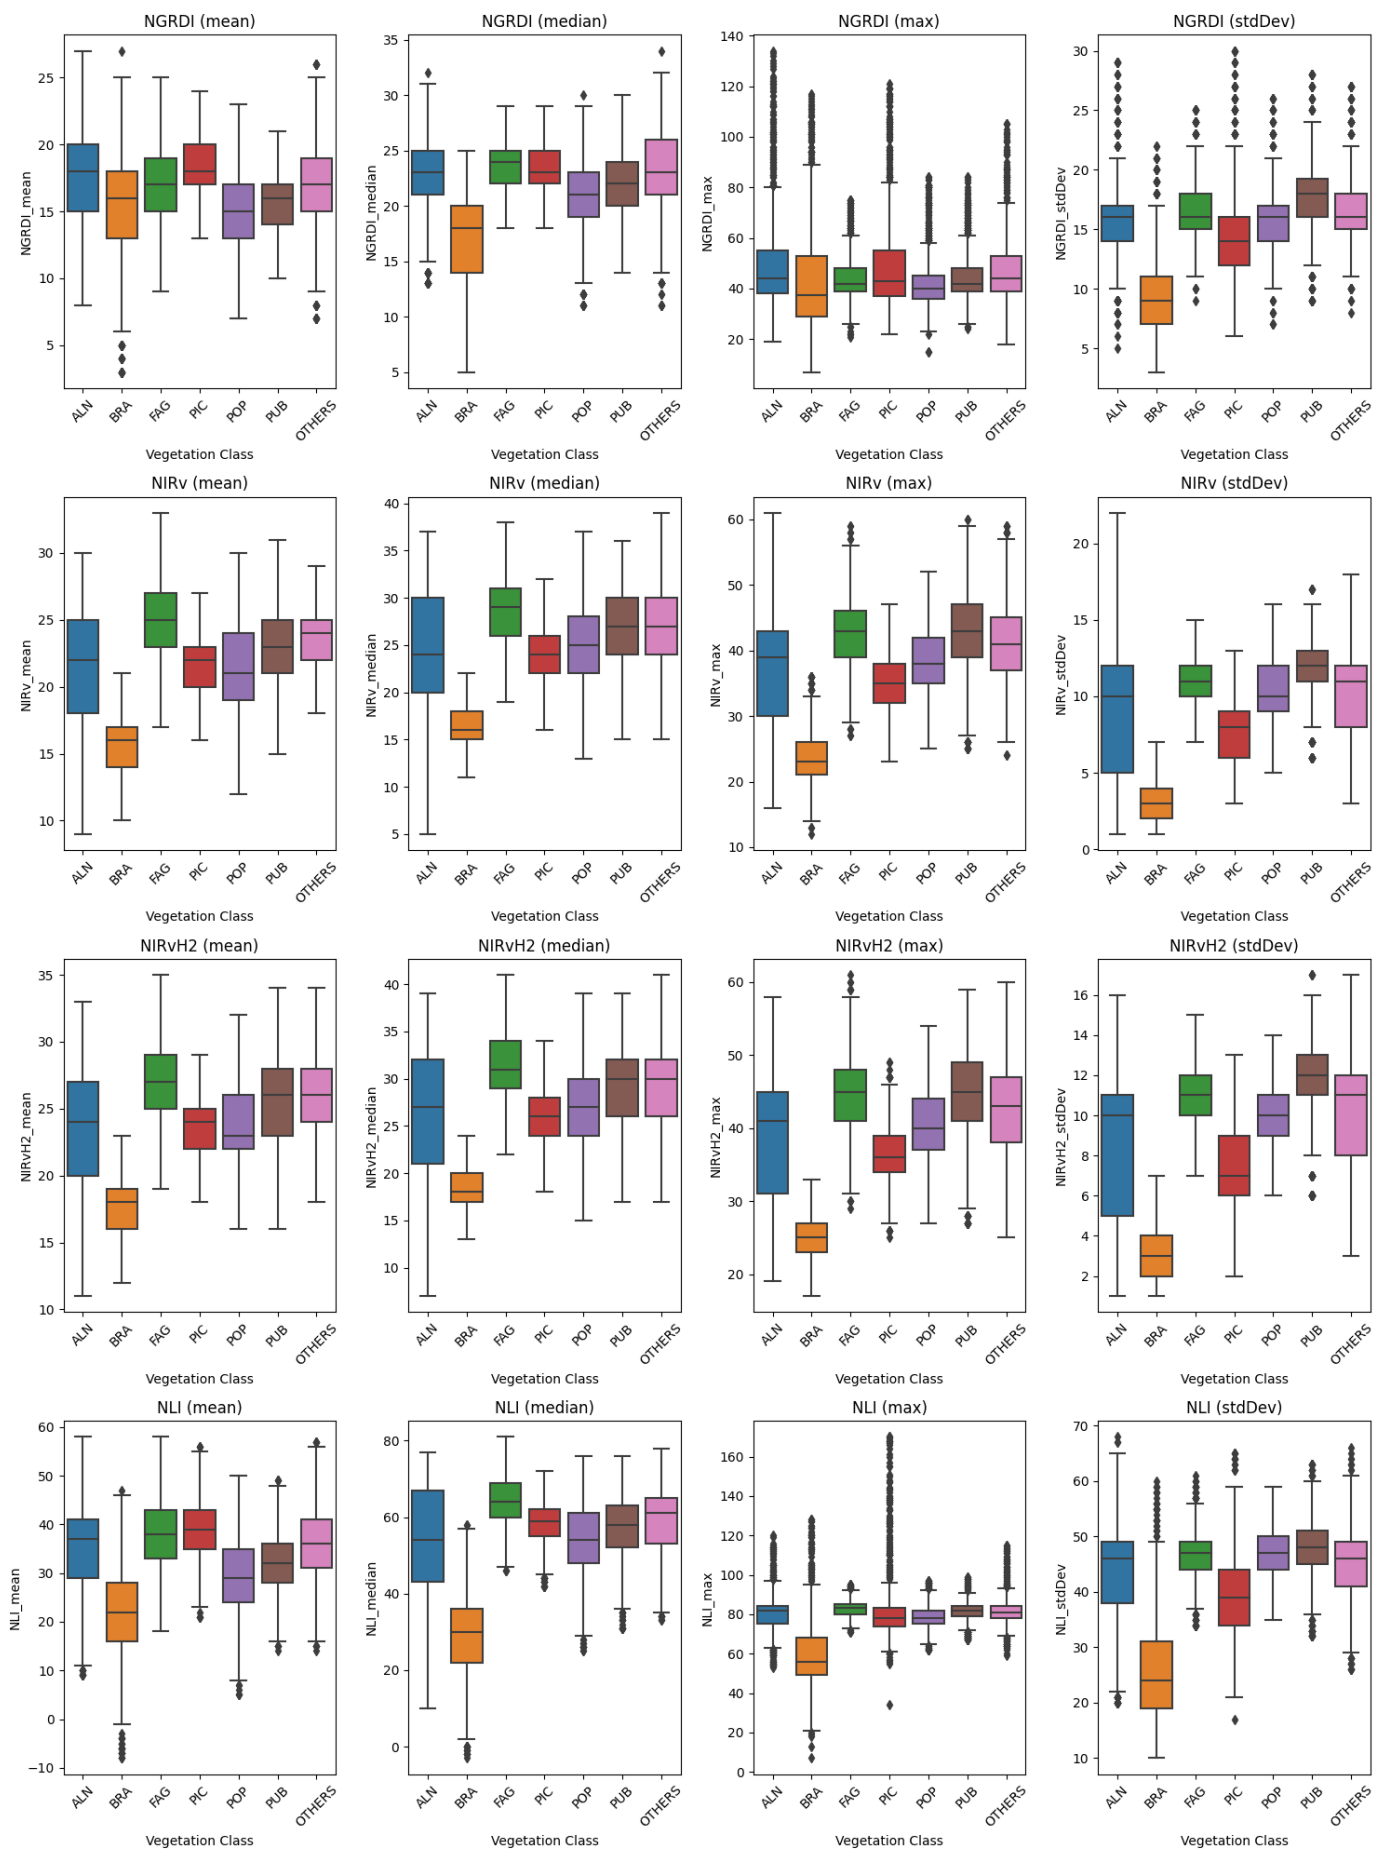

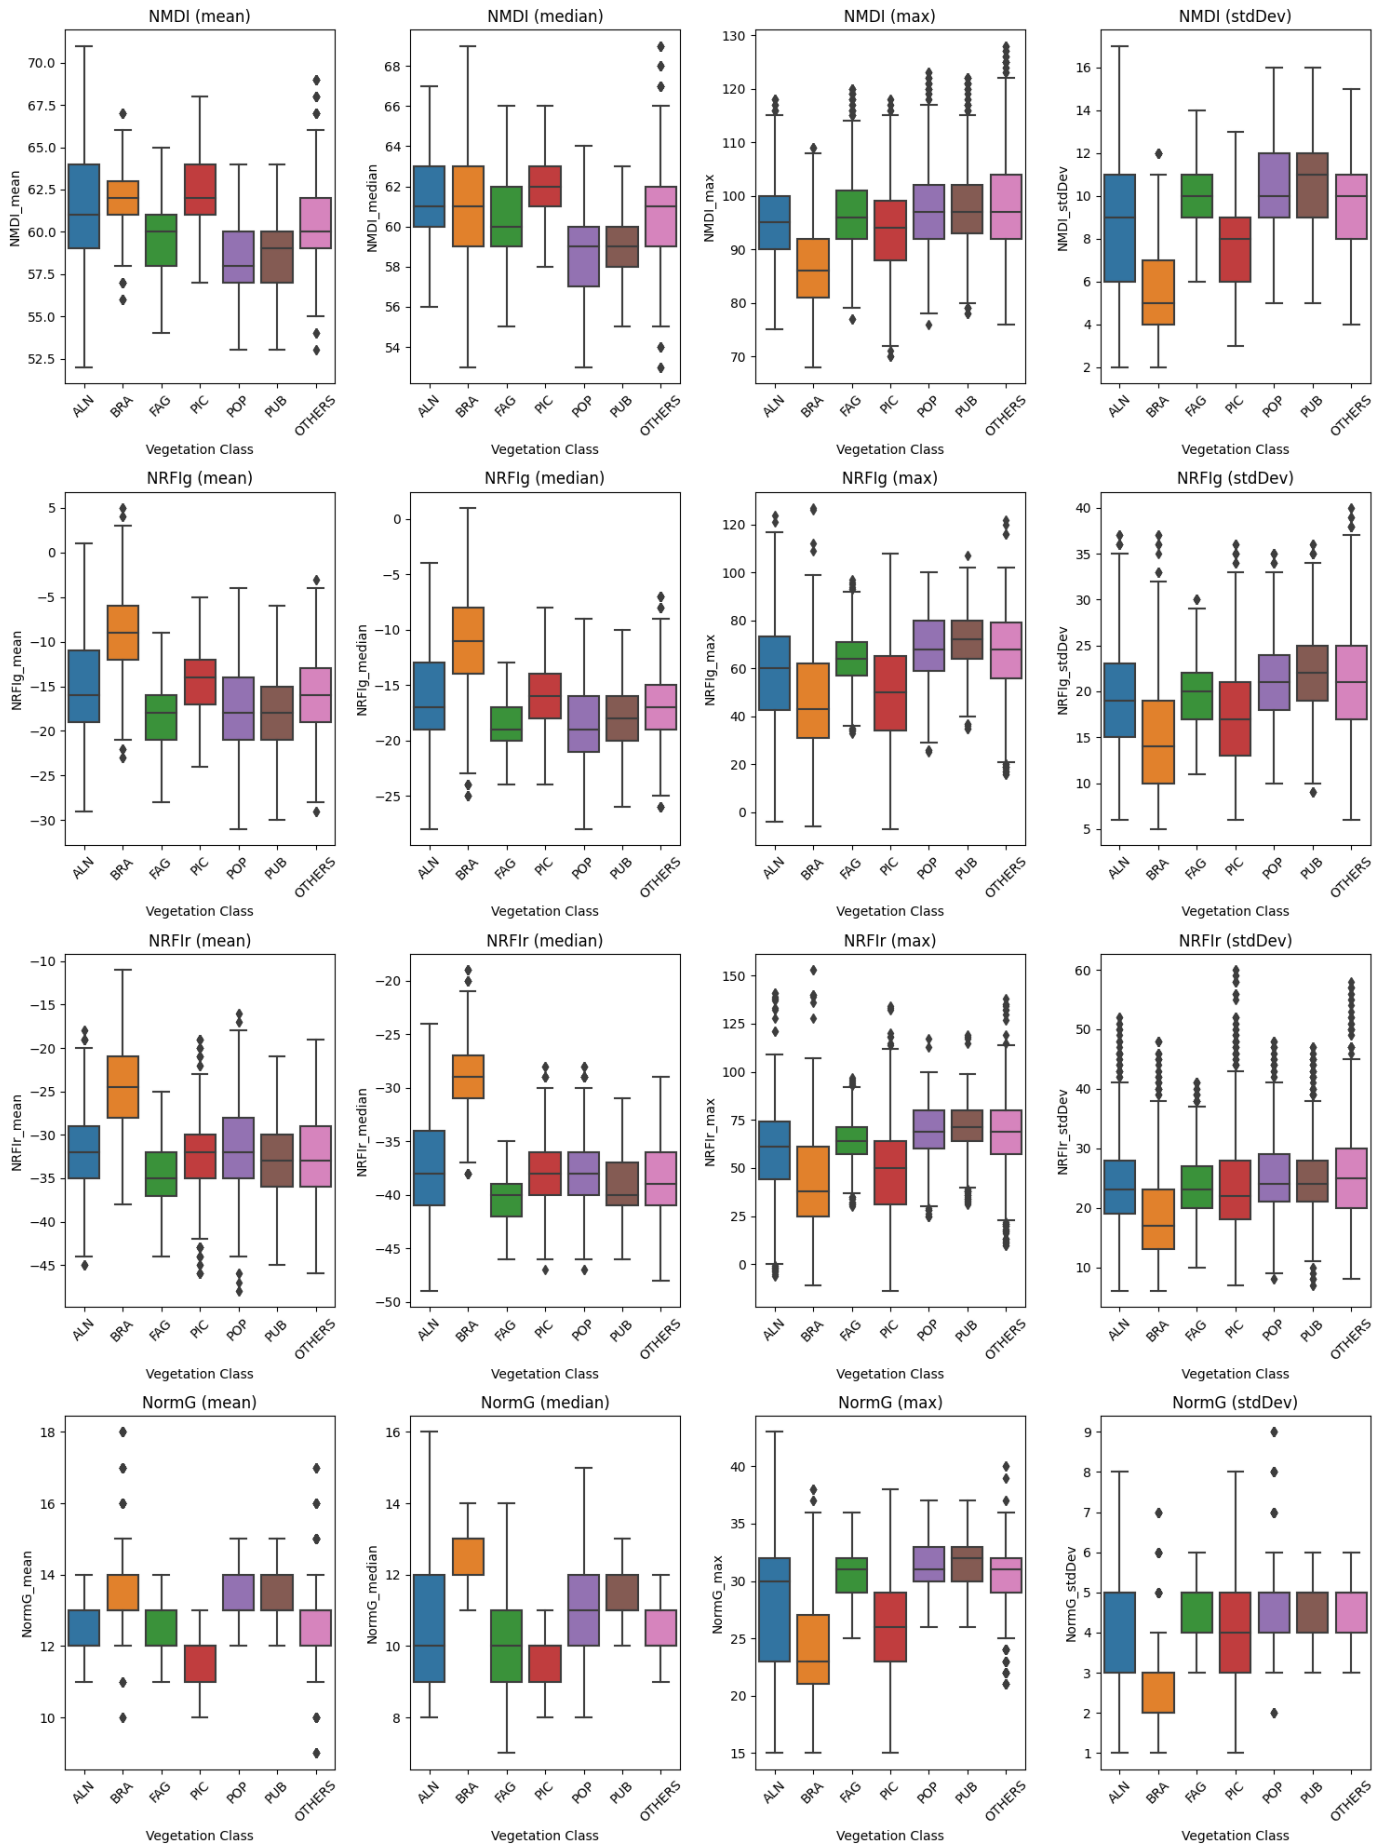

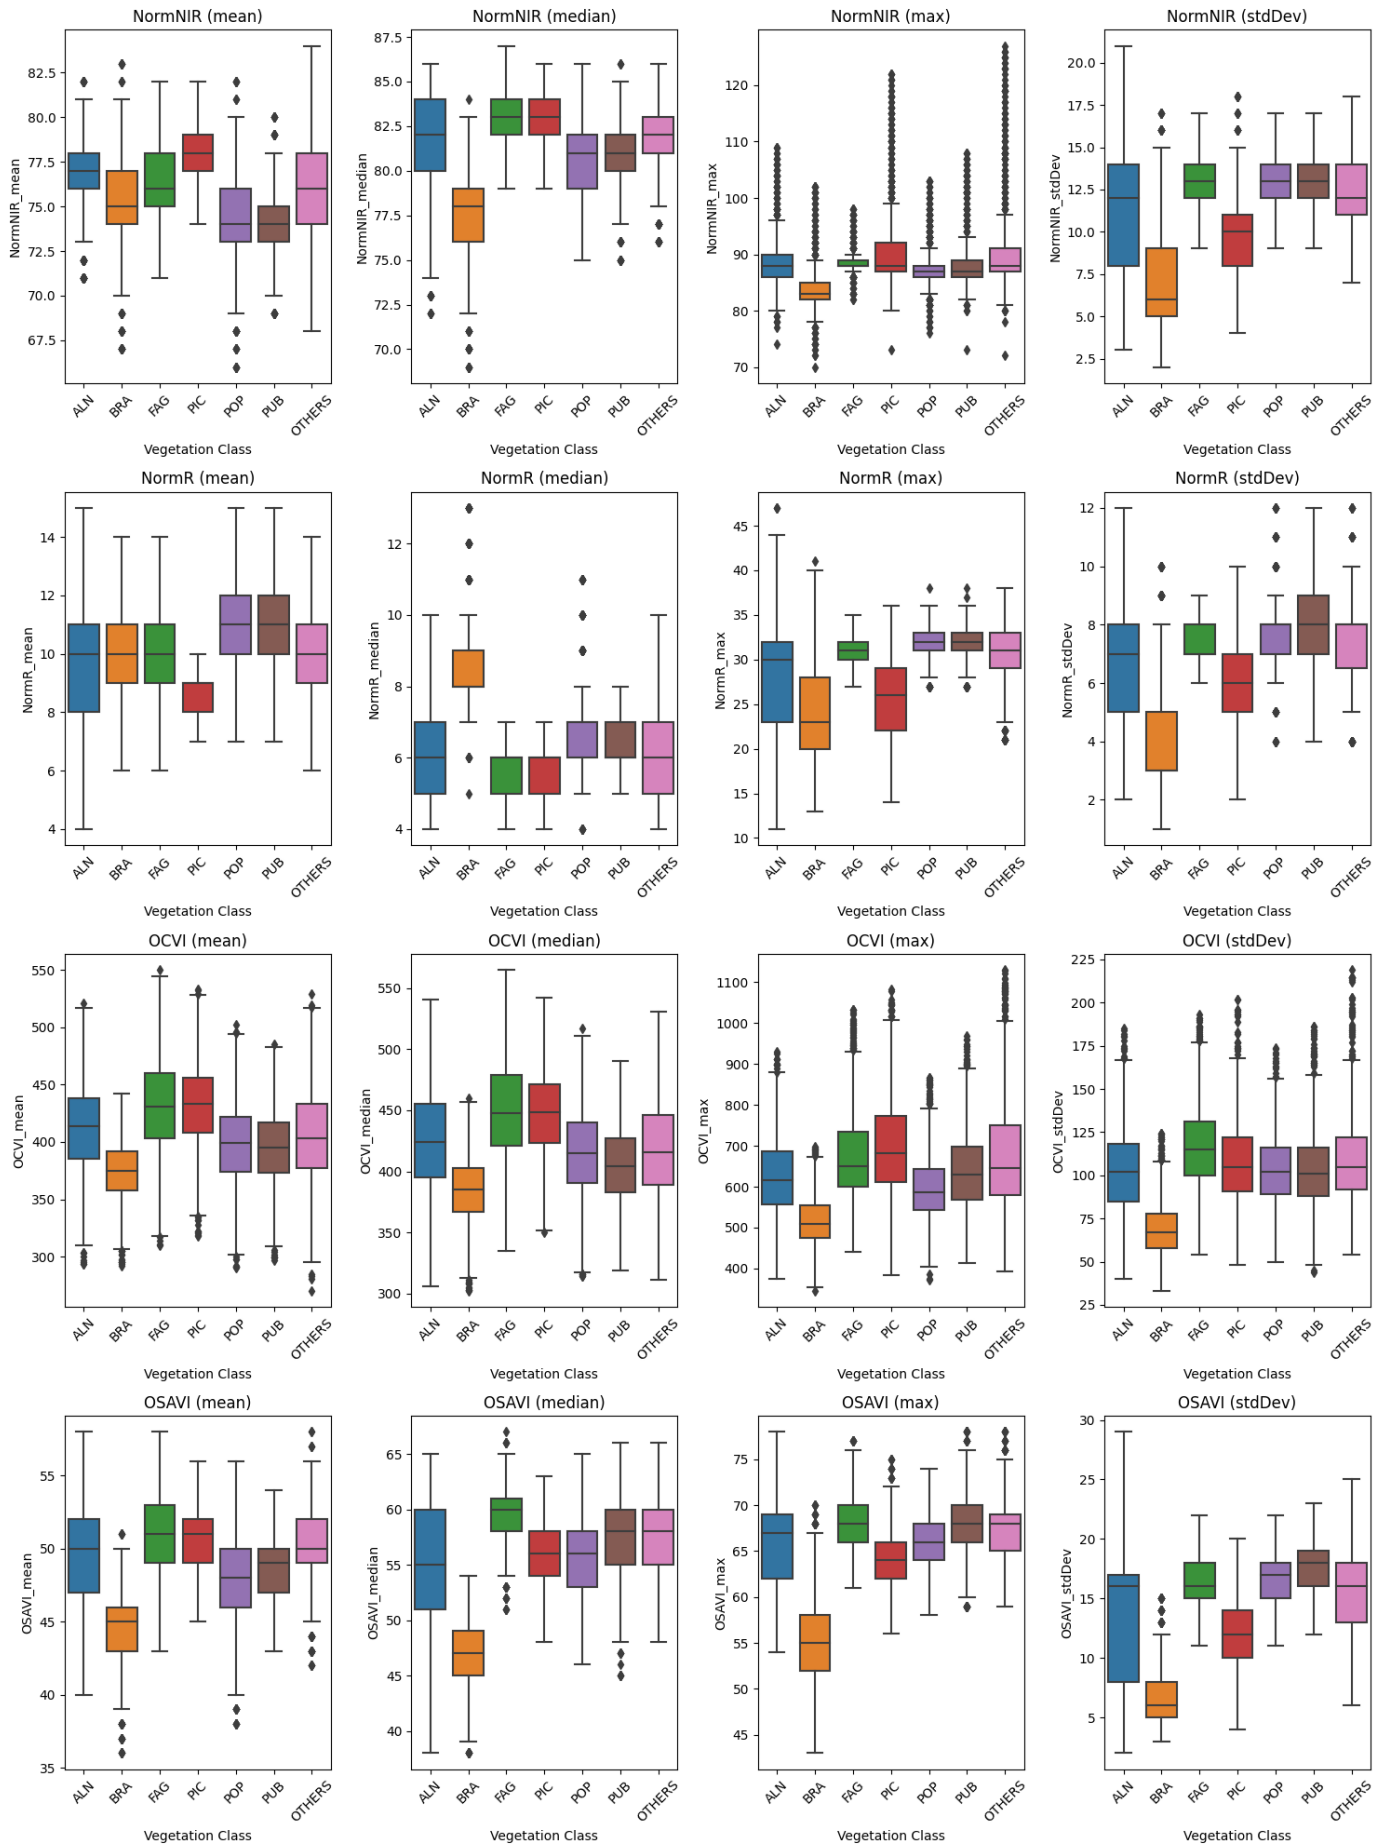

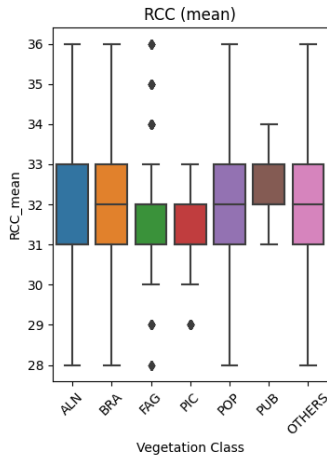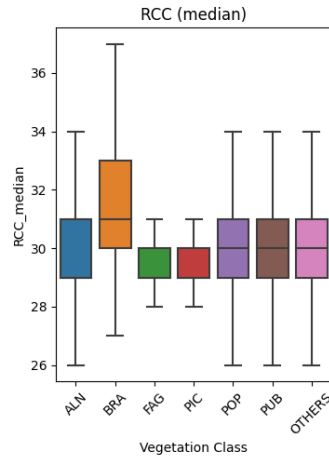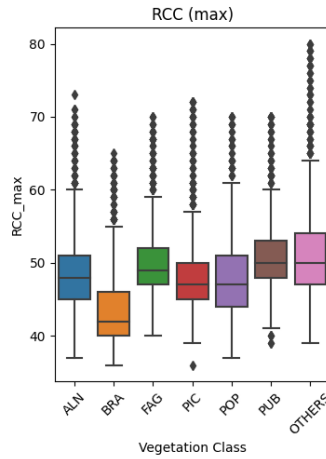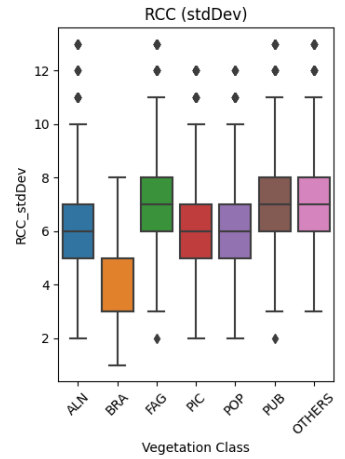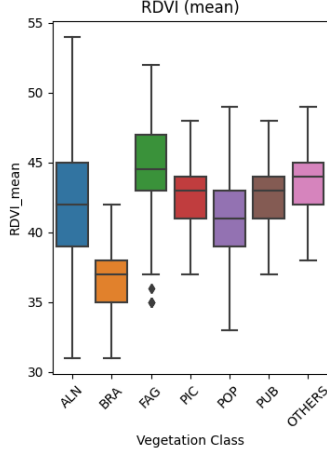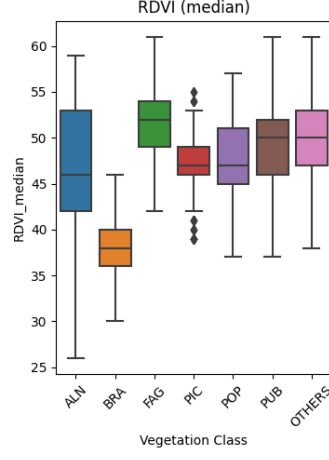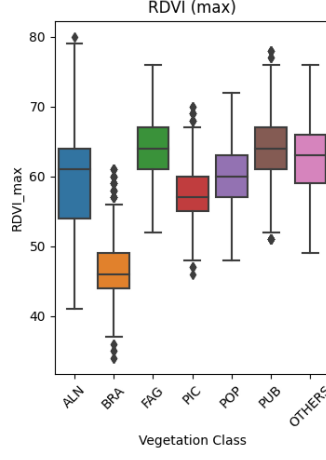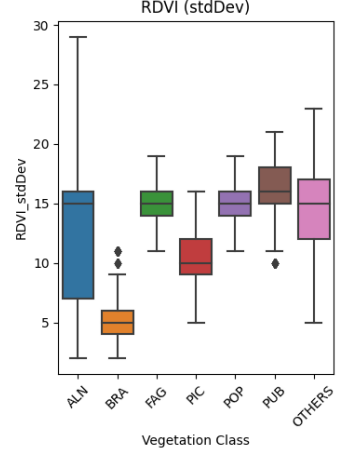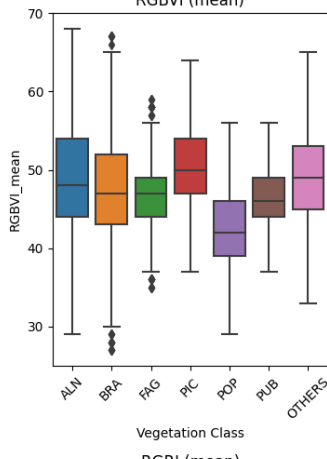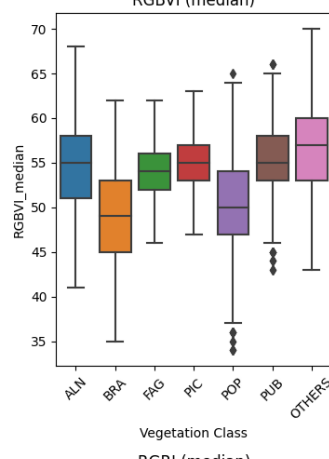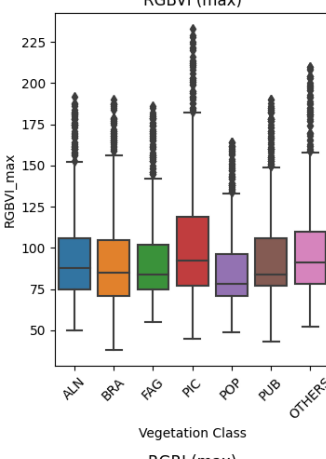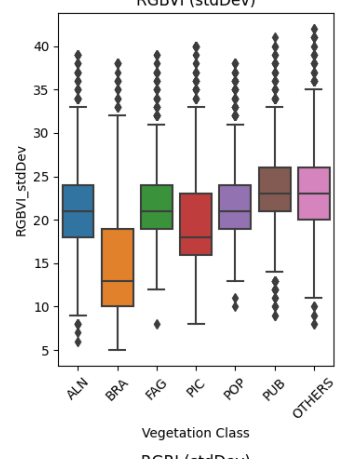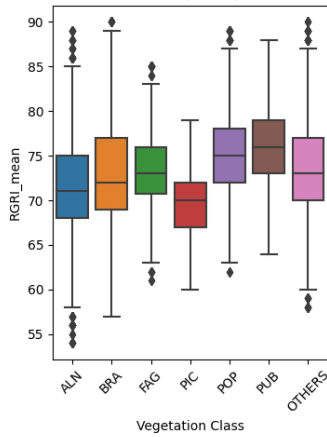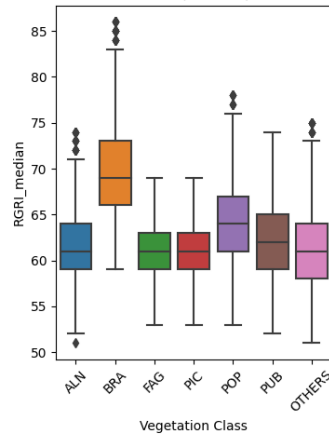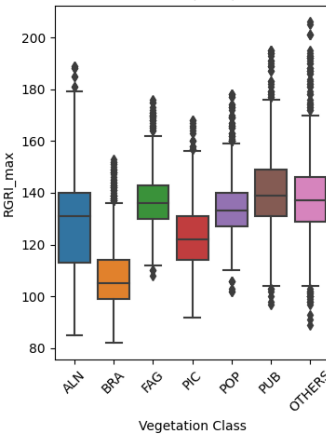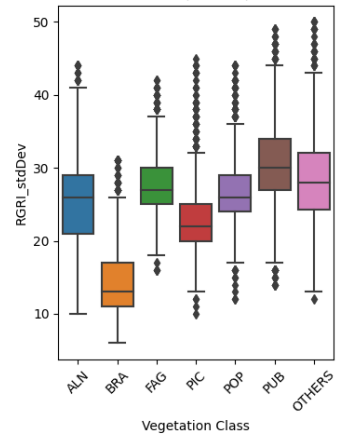

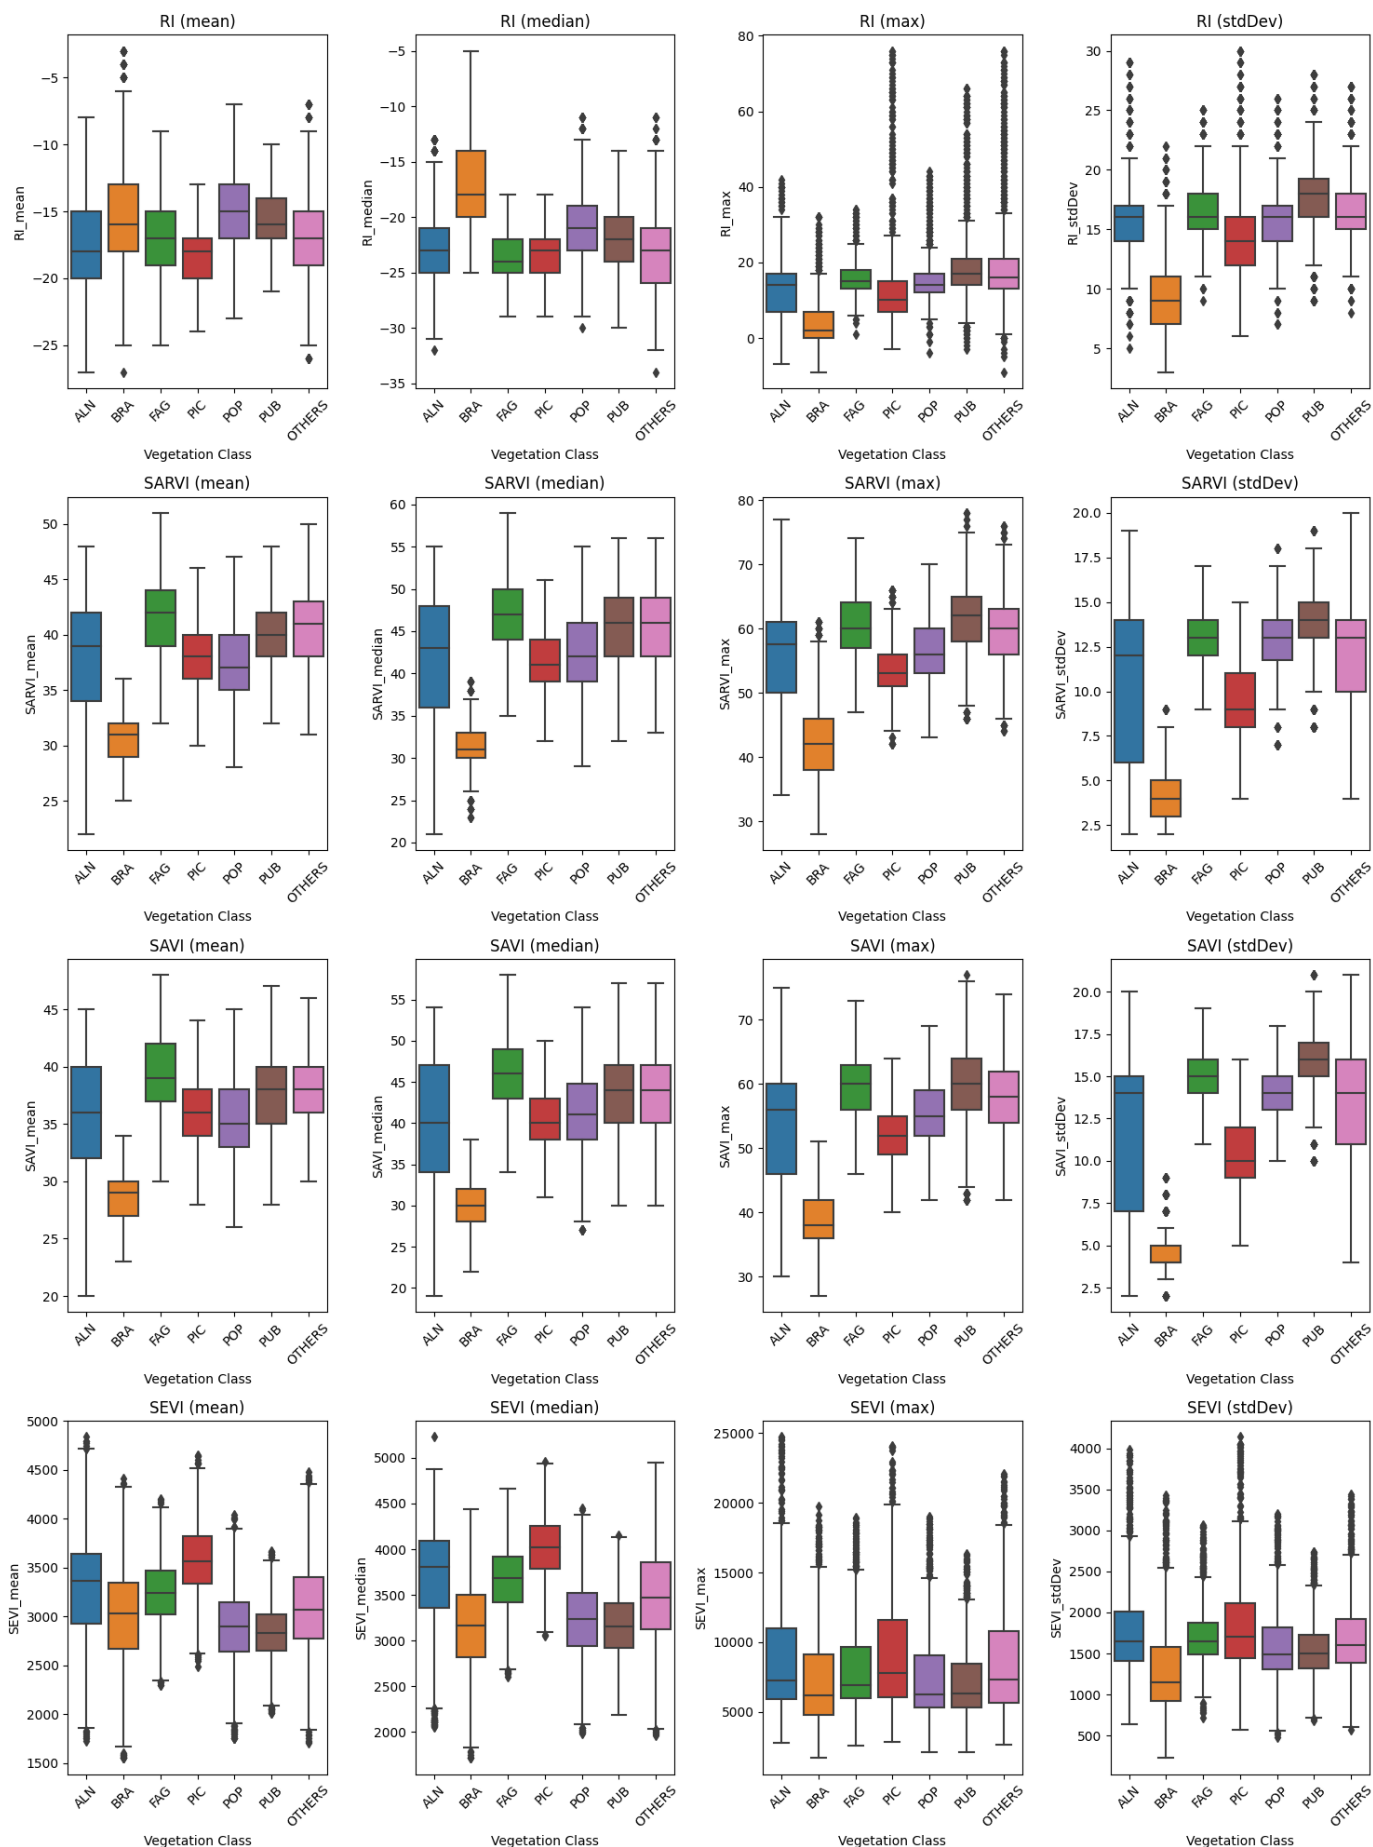

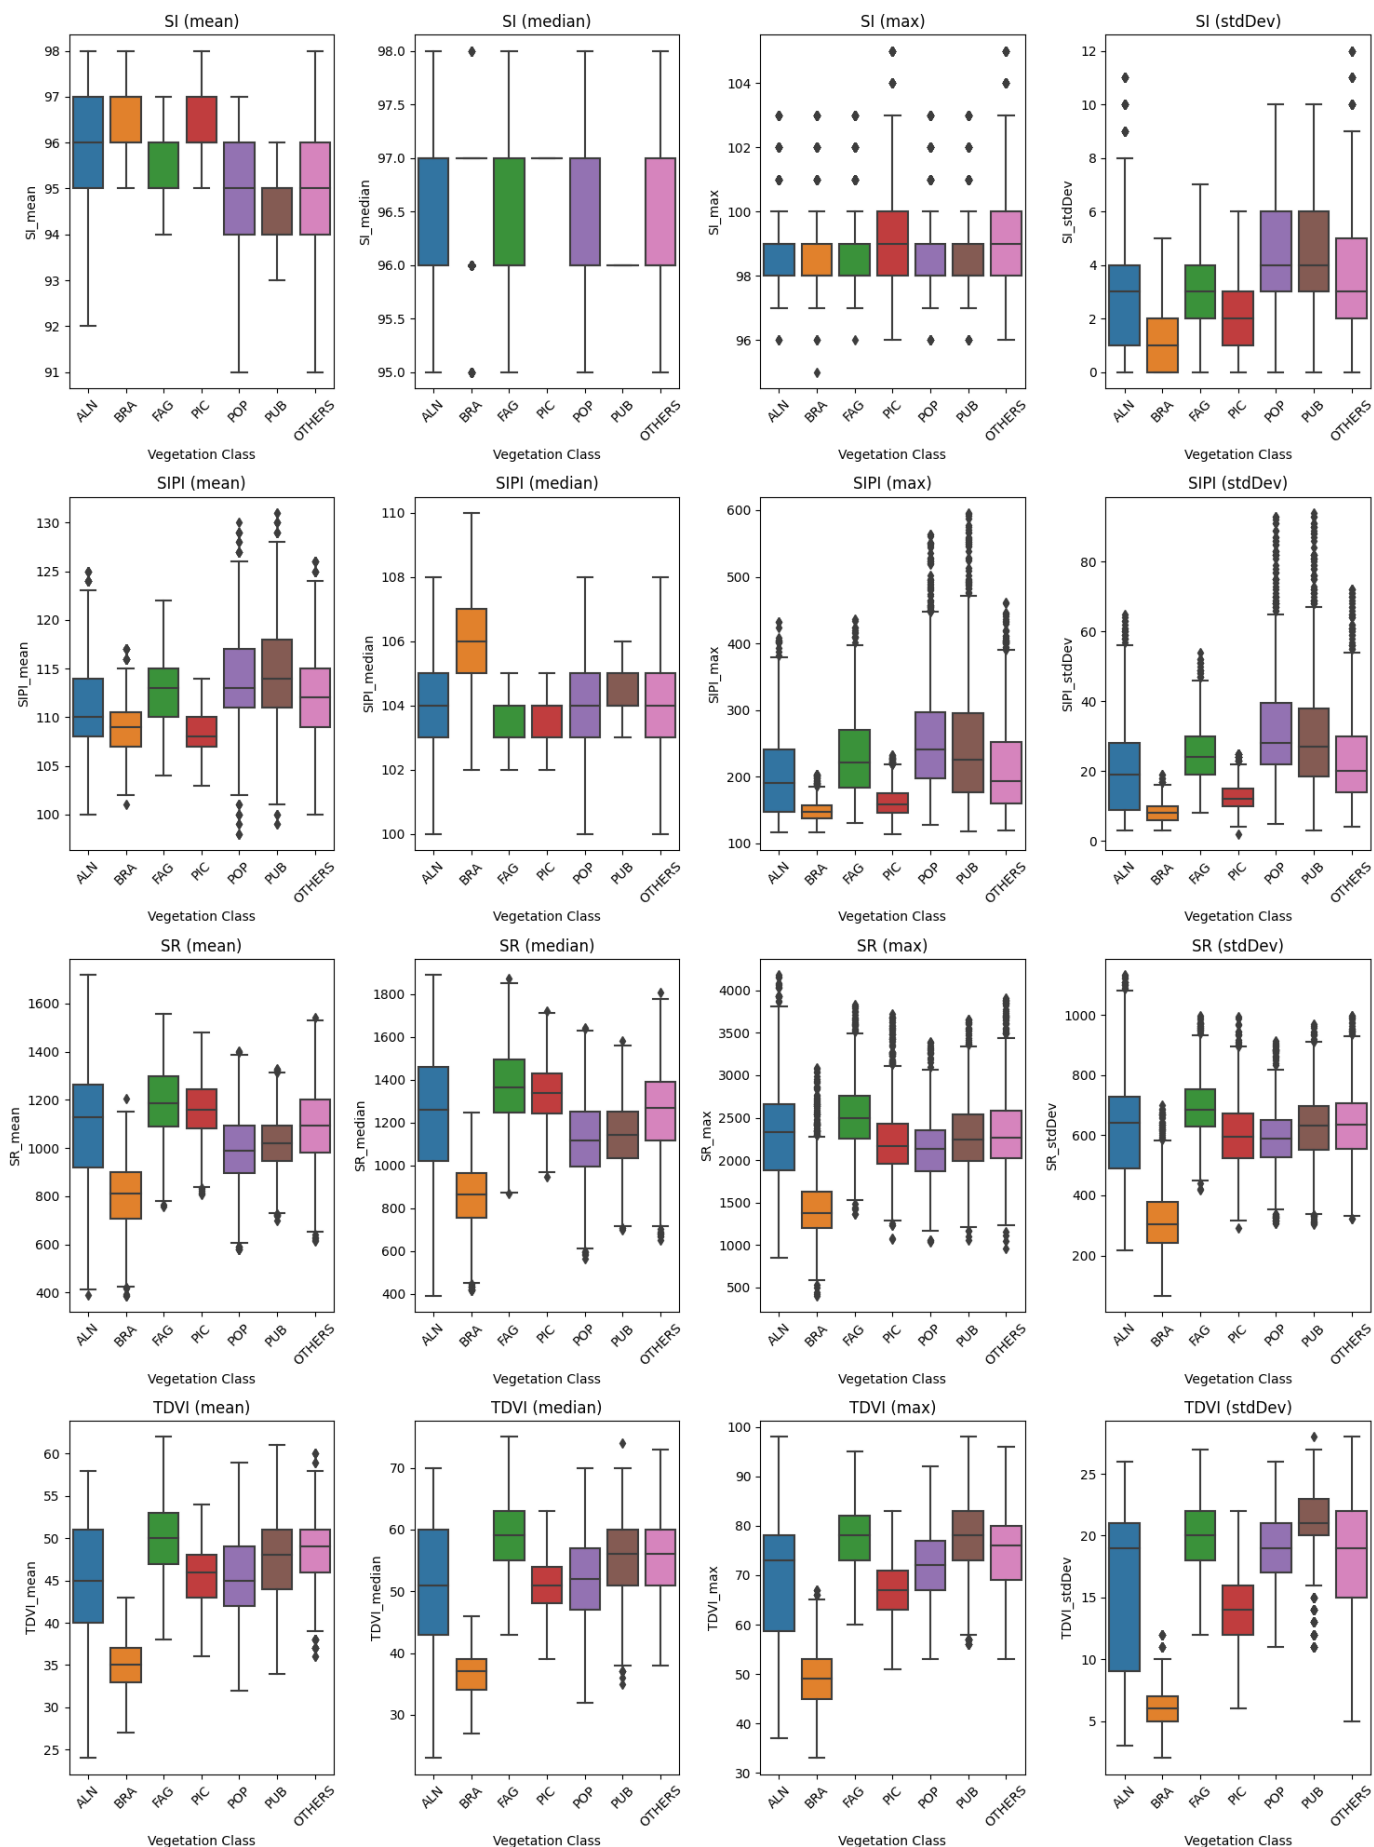



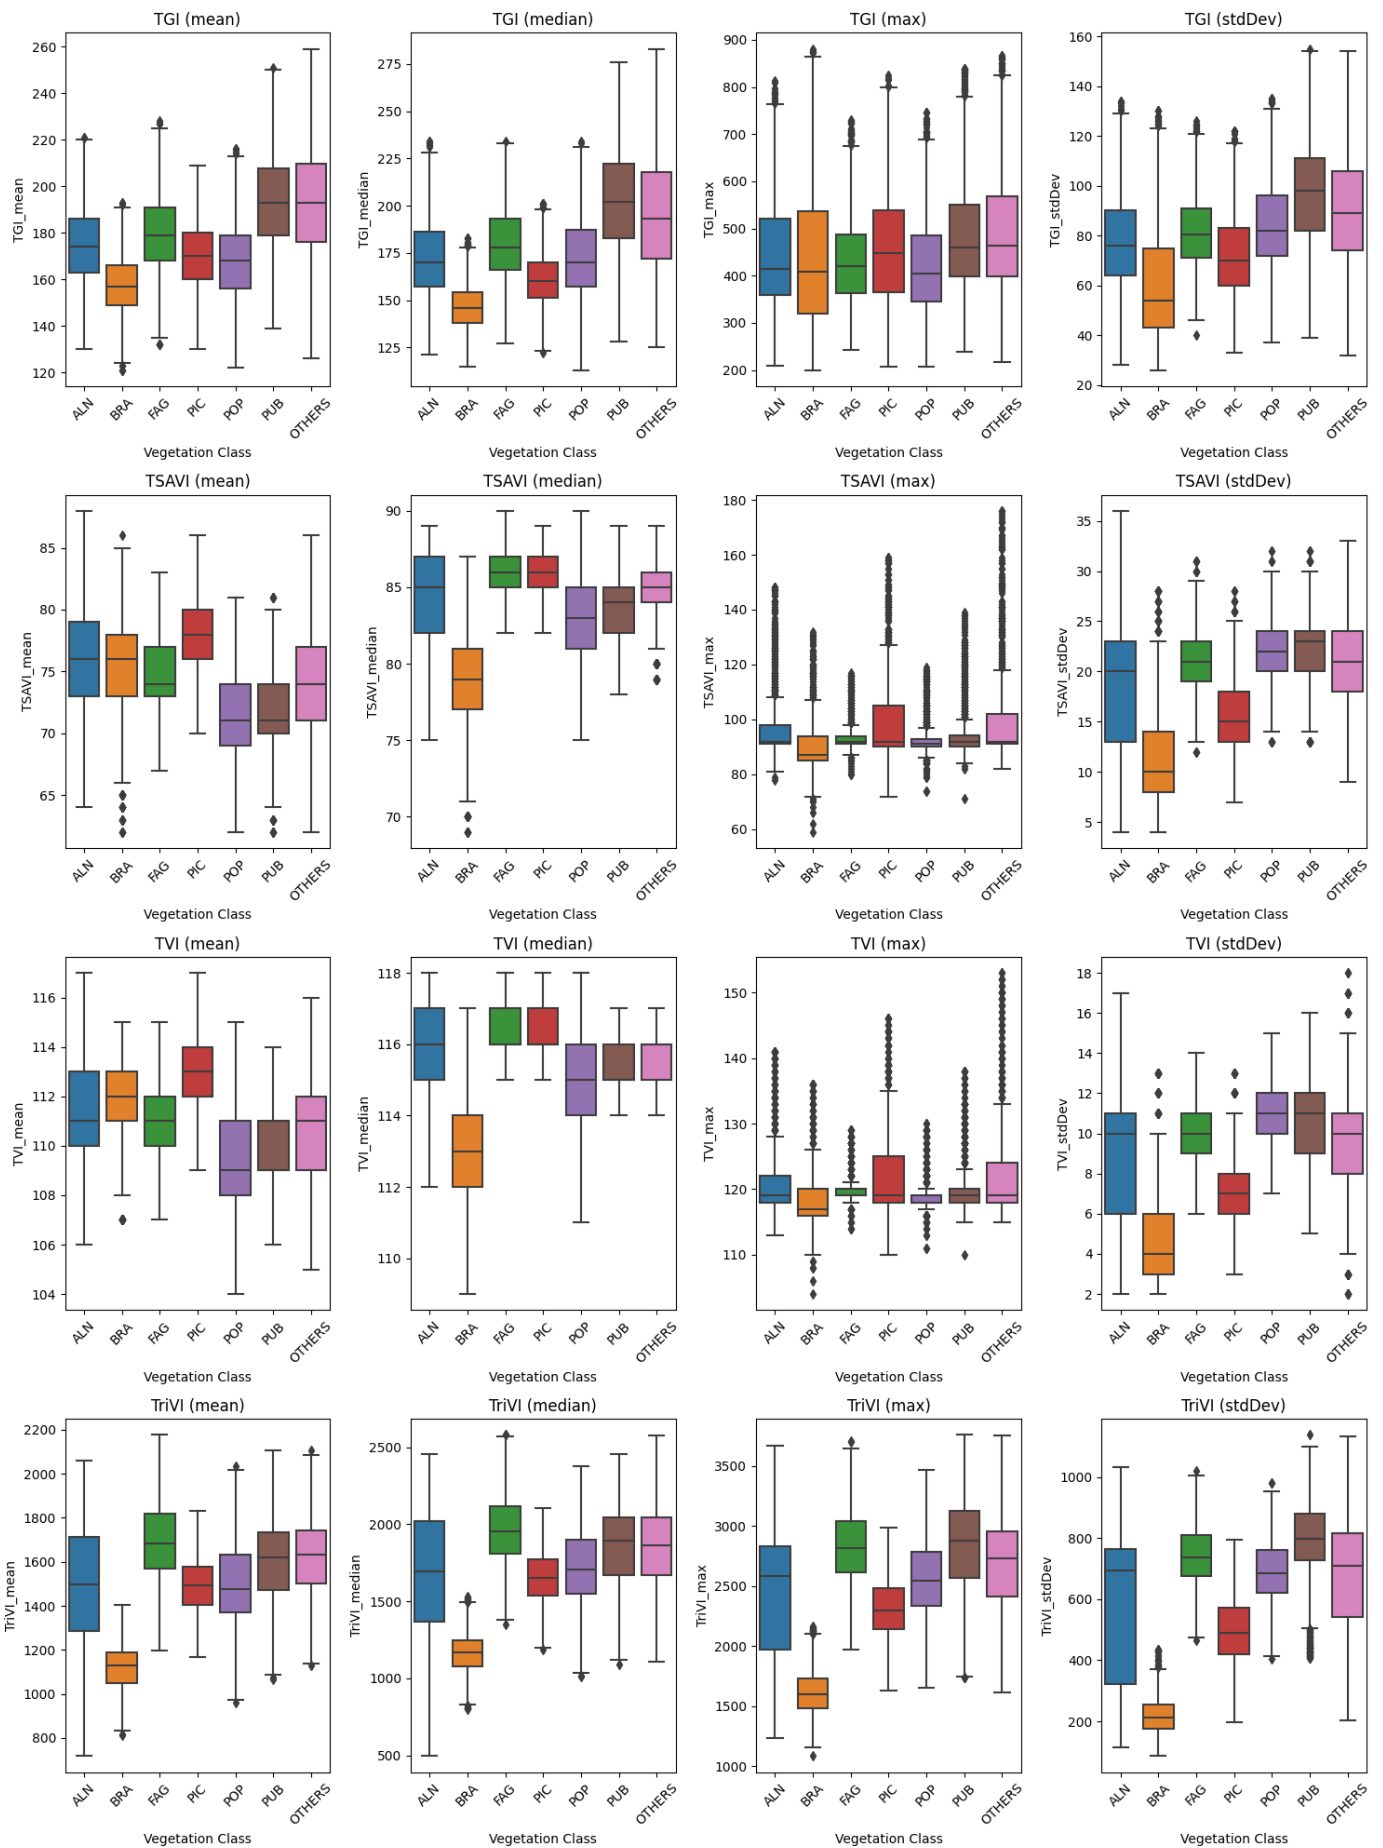

Supplement: Supplementary file 1 [file supplementary]
